# Supplementary material for: Phylogenomic Analysis of micro-RNA Involved in Juvenile to Flowering-Stage Transition in Photophilic Rice and Its Sister Species
Source: MDPI journal article supplement (doi:10.3390/cells12101370), 2023-05-12
Supplement: s1 [file s1]

**Table S1:** Coordinates for 100kb region harboring *MIR172* for microsynteny analysis and coordinates for promoter and precursor for phylogenetic analysis.

| Species                   | miRNA   | Chromosome location | 100 Kb region coordinates |              | coordinates for phylogenetic analysis |              |
|---------------------------|---------|---------------------|---------------------------|--------------|---------------------------------------|--------------|
|                           |         |                     | Start position            | End position | Start position                        | End position |
| <i>Oryza sativa</i>       | miR172A | Chr 9               | 21638003                  | 21738111     | 21687503                              | 21688111     |
|                           | miR172B | Chr 1               | 46903572                  | 47003809     | 46953072                              | 46953809     |
|                           | miR172C | Chr 7               | 12238035                  | 12338145     | 12287535                              | 12288145     |
|                           | miR172D | Chr 2               | 37248091                  | 37348220     | 37297591                              | 37298220     |
|                           |         | Chr 2               | 37278665                  | 37378794     | 37328165                              | 37328794     |
| <i>Oryza barthii</i>      | miR172A | Chr 2               | 30933600                  | 31033623     | 30983100                              | 30983623     |
|                           | miR172B | Chr 1               | 36508471                  | 36608708     | 36557971                              | 36558708     |
|                           | miR172C | Chr 7               | 10661579                  | 10761689     | 10711079                              | 10711689     |
|                           | miR172D | Chr 2               | 30933582                  | 31033711     | 30983082                              | 30983711     |
| <i>Oryza glaberrima</i>   | miR172A | Chr 2               | 28423276                  | 28523296     | 28472775                              | 28473298     |
|                           | miR172B | Chr 1               | 32281490                  | 32381727     | 32330990                              | 32331727     |
|                           | miR172C | Chr 7               | 10582540                  | 10682650     | 10632040                              | 10632650     |
|                           | miR172D | Chr 2               | 28423257                  | 28523386     | 28472757                              | 28473386     |
| <i>Oryza glumaepatula</i> | miR172A | Chr 9               | 23357188                  | 23457296     | 23406688                              | 23407296     |
|                           | miR172B | Chr 1               | 46157906                  | 46258139     | 46207406                              | 46208139     |
|                           | miR172C | Chr 7               | 12284350                  | 12384460     | 12333850                              | 12334460     |
|                           | miR172D | Chr 2               | 37235412                  | 37335541     | 37284912                              | 37285541     |
| <i>Oryza punctata</i>     | miR172A | Chr9                | 26180640                  | 26280686     | 26230140                              | 26230686     |
|                           | miR172B | Chr1                | 45741747                  | 45841791     | 45791247                              | 45791791     |
|                           | miR172C | Chr2                | 38771836                  | 38871861     | 38821336                              | 38821861     |
|                           | miR172D | Chr2                | 38771883                  | 38871953     | 38821383                              | 38821953     |
| <i>Oryza rufipogon</i>    | miR172A | Chr 9               | 20367006                  | 20467114     | 20416506                              | 20417114     |
|                           | miR172B | Chr 1               | 39528018                  | 39628255     | 39577518                              | 39578255     |
|                           | miR172C | Chr 7               | 11393165                  | 11493275     | 11442665                              | 11443275     |
|                           | miR172D | Chr 2               | 33132612                  | 33232741     | 33182112                              | 33182741     |
| <i>Oryza brachyantha</i>  | miR172A | Chr9                | 13982760                  | 14082800     | 14032260                              | 14032800     |
|                           | miR172B | Chr1                | 33588435                  | 33688477     | 33587935                              | 33638477     |
|                           | miR172C | Chr7                | 7329288                   | 7429325      | 7378788                               | 7379325      |
|                           | miR172D | Chr2                | 26329138                  | 26429195     | 26378638                              | 26429195     |
| <i>Sorghum bicolor</i>    | miR172A | Chr 9               | 58724558                  | 58824659     | 58774058                              | 58774659     |
|                           | miR172B | Chr 3               | 74138339                  | 74238508     | 74187839                              | 74188508     |
|                           | miR172C | Chr 4               | 67595991                  | 67696109     | 67645491                              | 67646109     |
|                           | miR172D | Chr 2               | 22151215                  | 22251302     | 22200715                              | 22201302     |
|                           | miR172E | Chr 2               | 14072957                  | 14173071     | 14122457                              | 14123071     |

|                             |         |       |           |           |           |           |
|-----------------------------|---------|-------|-----------|-----------|-----------|-----------|
|                             | miR172F | Chr 5 | 19245951  | 19346068  | 19295451  | 19296068  |
| <i>Zea mays</i>             | miR172A | Chr 7 | 54226707  | 54326789  | 54276207  | 54276789  |
|                             | miR172B | Chr 5 | 221671349 | 221771474 | 221720849 | 221721474 |
|                             | miR172C | Chr 4 | 174104928 | 174205050 | 174154428 | 174155050 |
|                             | miR172D | Chr 6 | 171979786 | 172079859 | 172029286 | 172029859 |
|                             | miR172E | Chr 3 | 145751592 | 145851765 | 145801092 | 145801765 |
| <i>Arabidopsis thaliana</i> | miR172A | Chr2  | 11892914  | 11993015  | 11942414  | 11943015  |
|                             | miR172B | Chr5  | 1138207   | 1238301   | 1187707   | 1188301   |
|                             | miR172C | Chr3  | 3549776   | 3649908   | 3599276   | 3599908   |
|                             | miR172D | Chr3  | 20537904  | 20638027  | 20587404  | 20588027  |
|                             | miR172E | Chr5  | 23938472  | 24038596  | 23987972  | 23988596  |

**Table S2:** Forward and reverse primer sequence for amplification of *MIR172A, B, C* and *D* from different poaceae members and *Arabidopsis*.

| Primer name    | Forward               | Reverse                 | Amplicon size | Tm   |
|----------------|-----------------------|-------------------------|---------------|------|
| Os-miR172A     | TGGATGGAACGGTAGAGTCG  | TGAAACGGAGGGAGTGACAAG   | 224           | 59   |
| Os-miR172B     | CACAGAAAGAGGGAGGGAGG  | AGTAGAGAGTGTGATGCCGC    | 336           | 59.5 |
| Os-miR172C     | CCTGCACGTAGACAACCATG  | GCGGGCCCTATAAATTCTGC    | 316           | 59   |
| Os-miR172D (i) | ATCAAAGCAGGCCATGGATC  | TCGATCTCCCTCTAGCTCCA    | 299           | 59   |
| Os-miR172D(ii) | ATCAAAGCAGGCCATGGATC  | GCACAAATTGGCGAGGATG     | 210           | 59   |
| Ob-miR172A     | ATCAAAGCAGGCCATGGATC  | AAACAGTCGGTGCTTGACAG    | 155           | 58   |
| Ob-miR172B     | CACAGAAAGAGGGAGGGAGG  | CCGGCAGTAGAGAGTGTGAT    | 341           | 59   |
| Ob-miR172C     | AAAGCTAATCCTGCCTGCC   | TCGTTGTAGGGTCGGAATC     | 294           | 60   |
| Ob-mir172D     | AAAGCAGGCCATGGATCGAG  | CAAATTGGCGAGGATGAGAGG   | 204           | 60   |
| Og-miR172A     | AAAGCAGGCCATGGATCGAG  | CAAATTGGCGAGGATGAGAGG   | 204           | 60   |
| Og-miR172B     | CACAGAAAGAGGGAGGGAGG  | CCGGCAGTAGAGAGTGTGAT    | 341           | 59   |
| Og-miR172C     | AAAGCTAATCCTGCCTGCC   | TGTAGGGTCGGAATCCAAC     | 290           | 60   |
| Og-mir172D     | ATCAAAGCAGGCCATGGATC  | CAAATTGGCGAGGATGAGAG    | 207           | 59   |
| Ou-miR172A     | TGGATGGAACGGTAGAGTCG  | AACGGAGGGAGTAACAAGG     | 222           | 58   |
| Ou-miR172B     | CACAGAAAGAGGGAGGGAGG  | AGTAGAGAGTGTGATGCCGC    | 332           | 60   |
| Ou-miR172C     | AAAGCTAATCCTGCCTGCC   | TGTAGGGTCGGAATCCAAC     | 290           | 59   |
| Ou-mir172D     | ATCAAAGCAGGCCATGGATC  | CCCTCTAGCTCCATTCTCCA    | 296           | 58   |
| Op-miR172A     | TATAGTCGGTGTTTGCGGGT  | TTATGTATTTGGGGACGG      | 257           | 59   |
| Op-miR172B     | ACCTGCTAGCCAATGTGTCA  | GACCTGGCATTGCATACCTG    | 224           | 59   |
| Op-miR172C     | AGGAAGGGGAAAGCTAGGAAC | GCAGCCGCGGTTATATATGG    | 234           | 58   |
| Op-mir172D     | CCATGGCGACGAGTAGTAGT  | CCGAATCTCCCTCTAGCTCC    | 268           | 59   |
| Or-miR172A     | AACCCCTAGCTAGAAGAGGC  | CGGAGGGAGTAACAAGGATG    | 347           | 58   |
| Or-miR172B     | CACAGAAAGAGGGAGGGAGG  | CCGGCAGTAGAGAGTGTGAT    | 341           | 59   |
| Or-miR172C     | CCTGCACGTAGACAACCATG  | GTAGGGTCGGAATCCAACA     | 268           | 59   |
| Or-mir172D     | ATCAAAGCAGGCCATGGATC  | TCGATCTCCCTCTAGCTCCA    | 299           | 59   |
| Oa-miR172A     | GGACTCTCCCTTTTCCCTCC  | TGGGCTGTTGAGAGAAGAAG    | 227           | 59   |
| Oa-miR172B     | AGCTGCTAGGATGAACTCGA  | ATCTGAGAATAGACGGATCGAAG | 157           | 58   |
| Oa-miR172C     | TCAGTAGAGGAGTGCTTGCC  | GATTCCATCCAATCCAGCGAG   | 216           | 59   |
| Oa-mir172D     | GGCCAGGGGAAGCTATAACT  | AGACGAAGCAGCAAACAGTC    | 244           | 58   |
| Sb-miR172A     | ATTCGGCGTCTCTCACTGTC  | ACAACCTTAGCTTCCACATC    | 284           | 58   |
| Sb-miR172B     | GCACTGCTAGCTGATCTGAG  | TATAGCAGCTGGAGACGACG    | 343           | 58.5 |
| Sb-miR172C     | CGGGTGATGAGTGAGTGTCT  | CGTCTTGCCGGATCTCATTG    | 271           | 59   |
| Sb-mir172D     | GCCGTTACCTCTTTCTCAC   | GGATGGCACGATCTTTCACC    | 331           | 58   |
| Zm-miR172A     | CACCAAGCACCCAAACAAGA  | TGCAGTTGATTACCATGGCG    | 250           | 58   |
| Zm-miR172B     | CCATGTACCTCTCACCCAG   | ACTACGAACCCTTCCACAA     | 274           | 59   |
| Zm-miR172C     | TTTCCGACTTAAGGCATCCG  | CCGTAGTGCATGCTCTCAAG    | 211           | 59   |
| Zm-mir172D     | CTGTTGACACGGACTTGCTC  | AGCTCTTCCGGGACAGAAG     | 259           | 59   |

|            |                         |                         |     |      |
|------------|-------------------------|-------------------------|-----|------|
| At-miR172A | GGGAGAGAGAGAGAGAGGGA    | TGGGTTTGAGTTTGAGTTTGAG  | 247 | 58   |
| At-miR172B | TTGTAGCCGTCGATTGTTGA    | GATCTCTTGTGCGTGCGTAA    | 185 | 58.5 |
| At-miR172C | ACCTCCGATCTGTGAATTCCT   | ATGGTGCCGTCTTGAGTCTT    | 279 | 59   |
| At-mir172D | GGGTTAGCATGTTGATGACTTCA | TCGGAGGATTCTACATATGAGGA | 243 | 58   |

**Table S3.** Forward primer sequence for Rt-qPCR used for generating the expression profile of *MIR172* in different members of poaceae and Arabidopsis.

| MIRNA     | Forward Primer     |
|-----------|--------------------|
| Os-miR172 | GAATCTTGATGATGCTGC |

## Supplementary Data 1

### Nucleotide sequence of PCR amplified and Sanger sequenced *MIR172 A-D* from different poaceae members

#### >Os-miR172A

TGGATGGAACGGTAGAGTCGGTGTGTTGCGGGCGTGGCATCATCAAGATTCACATCCATGCATATA  
TCACAAGACGCACATATACATCCGATTGGCTGAGAATCTTGATGATGCTGCATCCGCAGACAAG  
CGCCTTTTTTCTTTCAAAGGTAAGCTCCTCTGCTATTCAAAGACCATAACATTAGTTGTTTCATCAT  
CTTCATCCTTGTCACTCCCTCCGTTTCA

#### >Os-miR172B

CACAGAAAGAGGGAGGGAGGATCACTCTCGCCGGCGGCGTTGGTACAATTAAGCTGATGCTTAG  
TCATTAATTTCCGATGCAGCATCATCAAGATTTCCACACATATATACACATGCGCTTAATTAGCTT  
CGATCTCTCTCTCTCTCTCCATGCGTGCAACCATGCATCATGCAGGTGAGGGCCAGGAGAGAAA  
TATTAGCTAGCTAGGTTGTTGAGATCAGAACAAAGCTCAAAGATGCATAGACATATGCATGC  
ATGCAATGTAATGTGTGAATCTTGATGATGCCACGTCAGAAATCACCGACTGCTAGCTGCGGCAT  
CACACTCTCTACT

#### >Os-miR172C

CCTGCACGTAGACAACCATGCACACATATGCTTCCTGAAACAATACTAATAGAACAATATATAT  
ACGGCCGGCTCTTTGCTGGTGACGATCATCAAGATTCACGCACGATGACTACACTTGAAAACCG  
ATACGTGTGCCGTGCGGCACACGTGAATCTTGATGACGCTGCACCCGCAACAAGTCGGGCTCAGCT  
CGCATCCACCGCGCGCGCCGATGACGAATTGGCGACGGCGGCGGCGCGGCGGCTGTTGGATT  
CCCGACCCTACAACGAACGGGCTGTGGCCTGTGGGGGCAGCAGAATTTATAGGGCCCCG

#### >Os-miR172Di

ATCAAAGCAGGCCATGGATCGAGACGAGTAGTCGAGCGTTTGCTGATGCAGCATCATCAAGATT  
CTCATCACATATAGTCAGCCAACCTCGATCTCGTTTAGGGATGAACTCGATGTGAATCTTGATGGT  
GCTGCACCTGCAAGCACCGACTGTTTGCTACTAGCTCCATATATGCATCGATCCATGCCTCTCATC  
CTCGCCAATTTGTGCCAATTTGTGAGATCGATGCATATATATGGTGCATACACTACCAGAAGAAT  
GGATAGTATATATGGAGAATGGAGCTAGAGGGAGATCGA

#### >Os-miR172Dii

ATCAAAGCAGGCCATGGATCGAGACGAGTAGTCGAGCGTTTGCTGATGCAGCATCATCAAGATT  
CTCATCACATATAGTCAGCCAACCTCGATCTCGTTTAGGGATGAACTCGATGTGAATCTTGATGGT  
GCTGCACCTGCAAGCACCGACTGTTTGCTACTAGCTCCATATATGCATCGATCCATGCCTCTCATC  
CTCGCCAATTTGTGC

#### >Ob-miR172A

ATCAAAGCAGGCCATGGATCGAGACGAGTAGTCGAGCGTTTGCTGATGCAGCATCATCAAGATT  
CTCATCACATATAGTCAGCCAACCTCGATCTCGTTTAGGGATGAACTCGATGTGAATCTTGATGGT  
GCTGCACCTGCAAGCACCGACTGTTT

#### >Ob-miR172B

CACAGAAAGAGGGAGGGAGGATCACTCTCGCCGGCGGCGTTGGTACAATTAAGCTGATGCTTAG  
TCATTAATTTCCGATGCAGCATCATCAAGATTTCCACACATATATACACATGCGCTTAATTAGCTT

CGATCTCTCTTCTCTCTCCATGCGTGCAACCATGCATCATGCAGGTCAGGGCCGGGAGAGAAA  
TATTAGCTAGCTAGGTTGTTGAGATCAGAAACAACAAGCTCAAAGATGCATAGACATATGCATGC  
ATGCAATGTAATGTGTGAATCTTGATGATGCCACGTCAGAAATCACCGACTGCTAGCTGCGGCAT  
CACACTCTCTACTGCCGG

**>Ob-miR172C**

AAAGCTAATCCTGCCTGCCTGCCTGCACGTAGACAACCATGCACACATATGCTTCCTGAAACAAT  
ACTAATAGAACAATATATATACGGCCGGCTCTTTGCTGGTGCAGCATCATCAAGATTCACGCACG  
ATGACCACACTTGAAAACCGATACGTGTGCCGTGCGGCACACGTGAATCTTGATGACGCTGCAC  
CCGCAACAAGTCGGCTCAGCTCGCATCCACCGCGCGCGCCGATGACGAATTGGCGACGGCGG  
CGGCGCGCGGCCTGTTGGATTCCCGACCCTACAACGA

**>Ob-miR172D**

AAAGCAGGCCATGGATCGAGACGAGTAGTCGAGCGTTTGCTGATGCAGCATCATCAAGATTCTC  
ATCACATATAGTCAGCCAACCTCGATCTCGTTTAGGGATGAACTCGATGTGAATCTTGATGGTGC  
TGCACCTGCAAGCACCGACTGTTTGCTACTAGCTCCATATATGCATCGATCCATGCCTCTCATCCT  
CGCCAATTTG

**>Og-miR172A**

AAAGCAGGCCATGGATCGAGACGAGTAGTCGAGCGTTTGCTGATGCAGCATCATCAAGATTCTC  
ATCACATATAGTCAGCCAACCTCGATCTCGTTTAGGGATGAACTCGATGTGAATCTTGATGGTGC  
TGCACCTGCAAGCACCGACTGTTTGCTACTAGCTCCATATATGCATCGATCCATGCCTCTCATCCT  
CGCCAATTTG

**>Og-miR172B**

CACAGAAAGAGGGAGGGAGGATCACTCTCGCCGGCGGCGTTGGTACAATTAAGCTGATGCTTAG  
TCATTAATTTCCGATGCAGCATCATCAAGATTTCCACACATATATACACATGCGCTTAATTAGCTT  
CGATCTCTCTTCTCTCTCCATGCGTGCAACCATGCATCATGCAGGTCAGGGCCGGGAGAGAAA  
TATTAGCTAGCTAGGTTGTTGAGATCAGAAACAACAAGCTCAAAGATGCATAGACATATGCATGC  
ATGCAATGTAATGTGTGAATCTTGATGATGCCACGTCAGAAATCACCGACTGCTAGCTGCGGCAT  
CACACTCTCTACTGCCGG

**>Og-miR172C**

AAAGCTAATCCTGCCTGCCTGCCTGCACGTAGACAACCATGCACACATATGCTTCCTGAAACAAT  
ACTAATAGAACAATATATATACGGCCGGCTCTTTGCTGGTGCAGCATCATCAAGATTCACGCACG  
ATGACCACACTTGAAAACCGATACGTGTGCCGTGCGGCACACGTGAATCTTGATGACGCTGCAC  
CCGCAACAAGTCGGCTCAGCTCGCATCCACCGCGCGCGCCGATGACGAATTGGCGACGGCGG  
CGGCGCGCGGCCTGTTGGATTCCCGACCCTACA

**>Og-miR172D**

ATCAAAGCAGGCCATGGATCGAGACGAGTAGTCGAGCGTTTGCTGATGCAGCATCATCAAGATT  
CTCATCACATATAGTCAGCCAACCTCGATCTCGTTTAGGGATGAACTCGATGTGAATCTTGATGGT  
GCTGCACCTGCAAGCACCGACTGTTTGCTACTAGCTCCATATATGCATCGATCCATGCCTCTCATC  
CTCGCCAATTTG

**>Ou-miR172A**

TGGATGGAACGGTAGAGTCGGTGTTTGCGGGCGTGGCATCATCAAGATTCACATCCATGCATATA  
TCACAAGACGCACATATACATCCGATTTGGCTGAGAATCTTGATGATGCTGCATCCGCAGACAAG  
CGCCTTTTTTTCTTTTCAAAGGTAAGCTCCTCTGCTATTCAAAGACCATAACATTAGTTGTTTCATCA  
TCTTCATCCTTGTTACTCCCTCCGTT

**>Ou-miR172B**

CACAGAAAGAGGGAGGGAGGATCACTCTCGCCGGCGGCGTTGGTACAATTAAGCTGATGCTTAG  
TCATTAATTTCCGATGCAGCATCATCAAGATTTCCACACATATATACACATGCGCTTAATTAGCTT  
CGATCTCTCTCTCTCTCTCCATGCGTGCAACCATGCATCATGCAGGTCAGGGCCGGGAGAGAAA  
TATTAGCTAGGTTGTTGAGATCAGAACAAAGCTCAAAGATGCATAGACATATGCATGCATGC  
AATGTAATGTGTGAATCTTGATGATGCCACGTCAGAAATCACCGACTGCTAGCTGCGGCATCACA  
CTCTCTACT

**>Ou-miR172C**

AAAGCTAATCCTGCCTGCCTGCCTGCACGTAGACAACCATGCACACATATGCTTCCTGAAACAAT  
ACTAATAGAACAATATATATACGGCCGGCTCTTTGCTGGTGCAGCATCATCAAGATTCACGCACG  
ATGACCACACTTGAAAACCGATACGTGTGCCGTGCGGCACACGTGAATCTTGATGACGCTGCAC  
CCGCAACAAGTCGGCTCAGCTCGCATCCACCGCGCGCGCCGCGCATGACGAATTGGCGACGGCGG  
CGGCGCGCGGCTGTTGGATTCCCGACCCTACA

**>Ou-miR172D**

ATCAAAGCAGGCCATGGATCGAGACGAGTAGTCGAGCGTTTGCTGATGCAGCATCATCAAGATT  
CTCATCACATATAGTCAGCCAACCTCGATCTCGTTTAGGGATGAACTCGATGTGAATCTTGATGGT  
GCTGCACCTGCAAGCACCGACTGTTTGCTACTAGCTCCATATATGCATCGATCCATGCCTCTCATC  
CTCGCCAATTTGTGCCAATTTGTGAGATCGATGCATATATATGGTGCATACACTACCAGAAGAAT  
GGATAGTATATATATATGGAGAATGGAGCTAGAGGG

**>Op-miR172A**

TATAGTCGGTGTTTGCGGGTGTTGGCATCATCAAGATTCACATCCACGCATATATCAAAGAAGCAC  
AGATATAGATTTTACATCCGATTTGGCTGAGAATCTTGATGATGCTGCATCCGCAGACAAGCGC  
CTTTTTATTTTTTCAAAGGTAAGTAGGAGCTGTGCTCTTCTGTTATTCATCATCATTCAAAGACCA  
TACATCAATTGTTTCATCATCTTCATCCTAGTTATTATATATGGCCGTCCCCAAATACATAA

**>Op-miR172B**

ACCTGCTAGCCAATGTGTCAGACTAAAGAGGGAGAGGATCATATCAGAGCTCTCGCCGGCGGTG  
TTGATCAACGGTACAGTATTTAAGCCGGCCTTACAATCGTGGAAGGTGAATTGATTTTTAGTCA  
TTAATTTCCGATGCAGCATCATCAAGATTCCCACACATATATACATCTCTCTGTTCTTCCTGGCAA  
GCAACCATGCAGGTATGCAATGCCAGGTC

**>Op-miR172C**

AGGAAGGGGAAAGCTAGGAACTGTACCTGAAGATTAATTTCCAGTCTCCAATAATCAAGCAGGC  
CATGGCGACGAGTAGTAGTCGAGCGATTGCTGATGCAGCATCATCAAGATTCTCATCACATATAT  
AGTCAGCCACCTCGATCTCGTTTAGGGATGAACTCGATGTGAATCTTGATGGTGTGCTGCACCTGCA  
AGCACCGACTGTTTGCTAGCTCCATATATAACCGCGGCTGC

**>Op-miR172D**



CCATGGCGACGAGTAGTAGTCGAGCGATTGCTGATGCAGCATCATCAAGATTCTCATCACATATA  
TAGTCAGCCACCTCGATCTCGTTTAGGGATGAACTCGATGTGAATCTTGATGGTGCTGCACCTGC  
AAGCACCGACTGTTTGCTAGCTCCATATATAACCGCGGCTGCCTCTCATCTCGCCAAGTTGCGA  
GATCGATGCATGGTGCATACACTACCAGAAGAATGGATAATATAAATGGAGAATGGAGCTAGA  
GGGAGATTCCG

#### >Or-miR172A

AACCCCTAGCTAGAAGAGGCTAGAGAAGAGCAAATCTCTCCCTTCTCCCTTGTGTCCAATGCATC  
TCTTGAATTTACTGTACTCTGGAGTAGAAGATACGAACAATGCTCAGTAGTACAGTAAATCCATG  
GATGGAACGGTAGAGTCGGTGTGCGGGCGTGGCATCATCAAGATTCACATCCATGCATATATC  
ACAAGACGCACATATACATCCGATTTGGCTGAGAATCTTGATGATGCTGCATCCGCAGACAAGC  
GCCTTTTTTCTTTTCAAAGGTAAGCTCCTCTGCTATTCAAAGACCATACATTAGTTGTTTCATCATC  
TTCATCCTTGTTACTCCCTCCG

#### >Or-miR172B

CACAGAAAGAGGGAGGGAGGATCACTCTCGCCGGCGGCGTTGGTACAATTAAGCTGATGCTTAG  
TCATTAATTTCCGATGCAGCATCATCAAGATTCCACACATATATACACATGCGTTTAATTAGCTT  
CGATCTCTCTTCTCTCTCCATGCGTGCAACCATGCATCATGCAGGTCAGGGTCAGGAGAGAAA  
TATTAGCTAGCTAGGTTGTTGAGATCAGAACAACAAGCTCAAAGATGCATAGACATATGCATGC  
ATGCAATGTAATGTGTGAATCTTGATGATGCCACGTCAGAAATCACCGACTGCTAGCTGCGGCAT  
CACACTCTCTACTGCCG

#### >Or-miR172C

CCTGCACGTAGACAACCATGCACACATATGCTTCCTGAAACAATACTAATAGAACAATATATAT  
ACGGCCGGCTCTTTGCTGGTGCAGCATCATCAAGATTCACGCACGATGACTACACTTGAAAACCG  
ATACGTGTGCCGTGCGGCACACGTGAATCTTGATGACGCTGCACCCGCAACAAGTCGGCTCAGCT  
CGCATCCACCGCGCGCGCCGATGACGAATTGGCGACGGCGGCGCGCGCGCCTGTTGGATT  
CCCGACCCTAC

#### >Or-miR172D

ATCAAAGCAGGCCATGGATCGAGACGAGTAGTCGAGCGTTTGCTGATGCAGCATCATCAAGATT  
CTCATCACATATAGTCAGCCAACCTCGATCTCGTTTAGGGATGAACTCGATGTGAATCTTGATGGT  
GCTGCACCTGCAAGCACCGACTGTTTGCTACTAGCTCCATATATGCATCGATCCATGCCTCTCATC  
CTCGCCAATTTGTGCCAATTTGTGAGATCGATGCATATATATGGTGCATACACTACCAGAAGAAT  
GGATAGTATATATGGAGAATGGAGCTAGAGGGAGATCGA

#### >Oa-miR172A

GGACTCTCCCTTTTCCCTCCTACTTGCTTAGATGCATATATCATGGCTGGTTTAGTCGGTGTGCG  
GGCGTGGCATCATCAAGATTCACATCTATGCACCGATAGATCGCTCTTTACGACATAGATTTCAG  
ACCCGTTTTGGCTAGCTGGATCTGGATGAGAATCTTGATGATGCTGCATCCGCAGACAAGCGCCT  
TCGATTCTCTCTTCTCTCTCAACAGCCCA

#### >Oa-miR172B

AGCTGCTAGGATGAACTCGATAGCTGGCGGCGTTGAATTGAAGGTAGAATGTGACTTGATTTTA  
GTCATTAATTTCCGATGCAGCATCATCAAGATTCCACACGTATATATGTACAACTTGATCAGT  
AGCTTCTTCGATCCGTCTATTCTCAGAT

TCAGTAGAGGAGTGCTTGCCGTAATAATATATAGAAGAATAAACAACACGGCCGGCTCTTTGCC  
GATGCAGCATCATCAAGATTCACGGACGACTGGGACCGACCGACATGCATGCACGATGCCACGC  
CACCAGGCCGGCGGCGCACACGTGAATCTTGGTGATGCCGCACCCGCAACAAGTCGGCCTCGCG  
CTCGCTCGCTGGATTGGATGGAATC

GGCCAGGGGAAGCTATAACTGTATATAAGTAAAAGCGTACCTGAGTCTCCAATTAAGCCGGCCA  
TGGCGACGAGTGTAGTCGAGCGTTTGCTGATGCAGCATCATCAAGATTCTCATCGCATATAGTCA  
GCCACACCTCGATCCCTCTCTCTCTCACTCTCTCTCTCTTTTAGGATGAACTCGACGATGTGA  
ATCTTGATGGTGCTGCACCTGCAAGCACCGACTGTTTGCTGCTTCGTC

ATTCGGCGTCTCTCACTGTCCAGGTGGGATGAGTGAGTGTTTGCTGATGCAGCATCATCAAGATTC  
TCATCTCATCACATACGCATATATTTATGTATATAGCATATCACCGAGGATGAGCTGGATGTGAA  
TCTTGATGATGCTGCACCTGCAAGCACCGACTGTGTTTGCTTGCCTGCTTGCTTCATAATCTGTAG  
CAGCTAACTTCAATTCTCCAAGTTCTTCAGGAAAGATGAGGATTTTATTTTTATTTTTTGAGATTAA  
AGATGTGGAAGCTAAGGTTG

[illegible]

CGGTTGATGAGTGAGTGTCTGCTGATGCAGCATCATCAAGATTCTCATCTCATCACATATGCATA  
TATAGCAACTGCGAGCCATCACATGAGCATCACTGAAGATGCATGAGTTGGACCATGTGAATCTT  
GATGGTGCTGCACCTGCAAGCACCCACTGTTTGCTTGCTTGCTTTCTGCTTGTTGCTTCATT  
CATATACAATAATCCATATATGGCAGCTAGCTTCTGCATGCGGCTTCGATCTCCAATGAGATC  
CGGCAAGACG

GCCGTTACCTCTTTCTACCGATGCCACATATATATAGCACCACCACAGACTCCTAGCCCCGAT  
 TAGTCTAGCATTGCACAGTCGGTGTTTGCGGGCGTGGCATCATCAAGATTACAACCCATGGATC  
 CAAATAAACCACTGATTTGGATCGAGGAGATGCATGAGAATCTTGATGATGCTGCATCCGCCAA  
 CAAGCGCCTACCATATATAACCACTCCTTCTGGATCTCTACTTCTCTAATGTAAGTAGTCTCAGAC  
 AGTATTGTGCTCATCTTCATCATCAATCGAGATCGCCCTCACGGTTAATTAAGGTGAAAGATCGT  
 GCCATCC

CAGAGAAAGGAAATAATATAGAAATGGTCGTTGTTTCGAATAAAAAATTTGCAAAGCTAGCTTTAG  
GCGGATGGGATGACGATCTTTCACCTTAGCTAAACGTGAAGATACAAAATCTCGATTGATGGCG  
AAGATGAGCACACAAACGTTCTGATGGCGCTTGTGGCGGATGCAGCATCATCAAGATTCTCATG  
CATGCATTCCAAATCAGTGGTTCGGATTGATGGGTTGTGAATCTTGATGATGCCACGC

**>Zm-miR172B**

AAGTTGATTAGCAAACAAGGTAGACTGAATGGAAAAAGAAATTAGAGGAGAACGAAGTGGTAC  
GTACCAGAGCTAGTAGCTGCATGGTCGTTAATTCAATTCATCTCTTATTACTTGGAGGTGATGCAT  
GAGCTAGTGAGTGTCTGCTGATGCAGCATCATCAAGATTCTCATCTCATCATATATATATACACA  
CACATGCGAGGCACGCATCATTGAAGATGCATATATGCATGATGCATGAGTTGGACGATGTGAA  
TCTTGATGGTGCTGCAC

**>Zm-miR172C**

TTTGTTAATGCATACATTCATATATATATTCCCATGAATGAATGCTTTAAGCATGAGGCAAGCAA  
ACATCGACAGTGGGTGCTTGAGGTGCAGCACCACCAAGATTACATCCAACCTCTCACGCATCTT  
CAGTGATGCATGCATGCTCTGTGATGTCTCGCAGCAGCTATATGCATATGTGATGAGATGAGAAT  
CTTGATGATGCTGCAT

**>Zm-miR172D**

TCTTCTTGATTTCATAGGCTCATCATCTATGCCTCTGTCATGCACACACTCGTGTCTTTCTTCTTGAT  
GGATACACGTACGGGGGGTGGGTGTTGTTACATATATAGTAGTATAGCTAGTTTATTAGATGCAG  
GTATACAGATCATGAGGAAGCAAGAAATTATGCAAAACAGTCGGTGCTTGAGGTGCAGCACCACCA  
TCAAGATTCACATCCCCAGCTCGATCTGTGCATGATGAGATGAGAATCTTGATGATGCTGCAT

**>At-miR172A**

GGGAGAGAGAGAGAGAGGGGAAAGAATAGTCGTTGATTGCCGATGCAGCATCATCAAGATTCTC  
ATTTTCATAGAGAACTTTGTGGAGAGTGAATCACCACCGTCCATCAACAGATGTGAATCTTGATG  
ATGCCACAGCAGCCAACAACGACCGTGGCTCCGGAAATTAGTCTTCCATTTTTGTTTAAACAATCT  
TCTTGATAGTAATCTTTTGTCTCTCAAACCTCAAACCTCAAACCTCAAACCTCAAACCCA

**>At-miR172B**

TTGTAGCCGTCGATTGTTGATGCAGCATCATCAAGATTCTCATATACATATCAAAACCCTAATTTA  
GGGTATTTATCAATTTCCATGTGAATCTTAATGGTGCTGCGCCTACAAACAACGACAGATGAGCT  
TTCTTCCATGGATCCGCCGACAACCTTGATAAAATTTACGCACGCACAAGAGAT

**>At-miR172C**

ACCTCCGATCTGTGAATTCCTACAAAAAGATTGGACTATGAAATTTCCAATCAACACAAACCTGT  
TTCTATGTGTAAGCCACTGATTGCAGCTGCAGCATCATCAAGATTCTCATACATACATCAAAAAT  
CTAATCATAAATGGGTTTATTTACACGAATACTTGATGATTTGTGAATCTTGATGATGCTCCAACA  
GCGAACAGTAGCTGGTTGATGATAGGGATGTATGTAGTGATTTGGTTTTGTCTTGATCTTTCAA  
GACTCAAGACGGCACCAT

**>At-miR172D**

GGGTTAGCATGTTGATGACTTCAGATTCTGAAGTTAGTGGCAGTCATTGTTTGCTATTGCAACATC  
TTCAAGATTCAGAAATCAGATTCTCTTATGGGTTTTCTTTTGGCCTTTATTTTTTGGTTTGAGAAT  
CTTGATGATGCTGCAGCGGCAATTAAATGGCTTACTTATCTAGGGTCTTTTTTTCCATTTTCATCAT  
GTGGTTAATCAGAAATCCAGATCCTCATATGTAGAATCCTCCGA

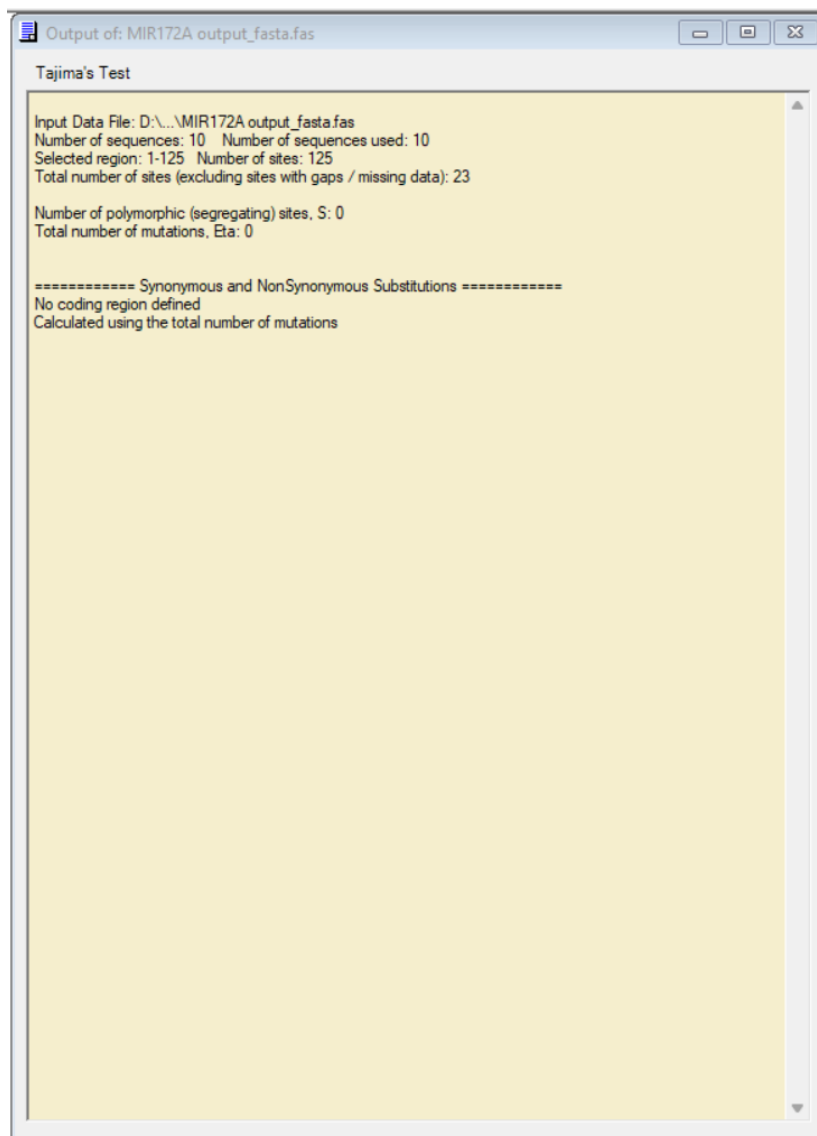

**Figure S1.** Screenshot of Tajima's test conducted on *MIR172A* sequences from *Oryza* spp, other poaceae members and Arabidopsis. A total of 10 sequences were included in the study.

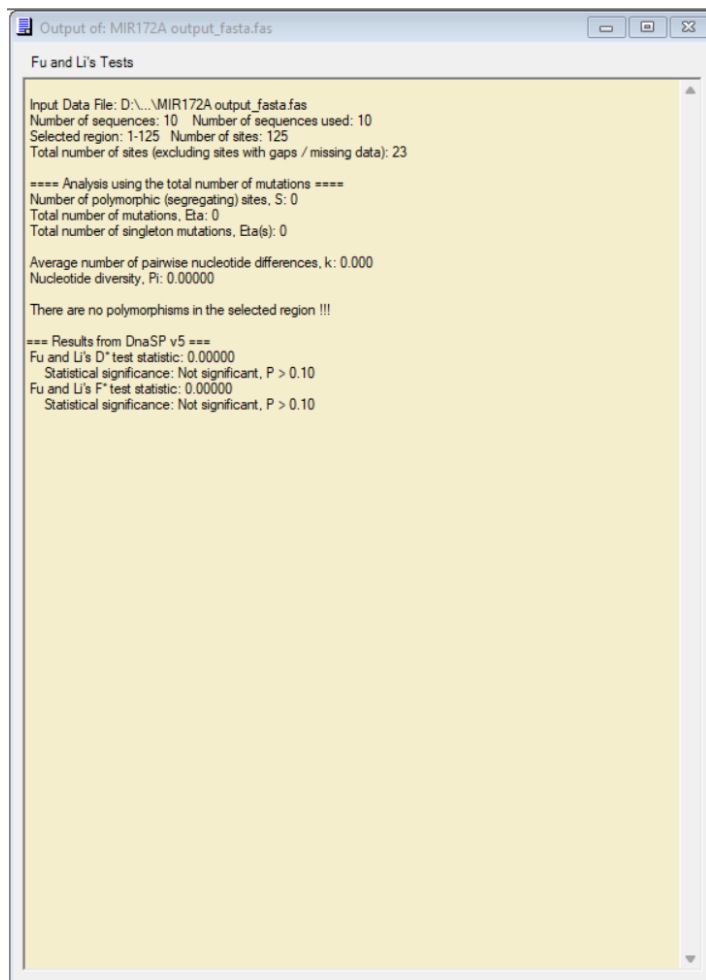

**Figure S2.** Screenshot of Fu and Li's test conducted on *MIR172A* sequences from *Oryza* spp, other poaceae members and *Arabidopsis*. A total of 10 sequences were included in the study.

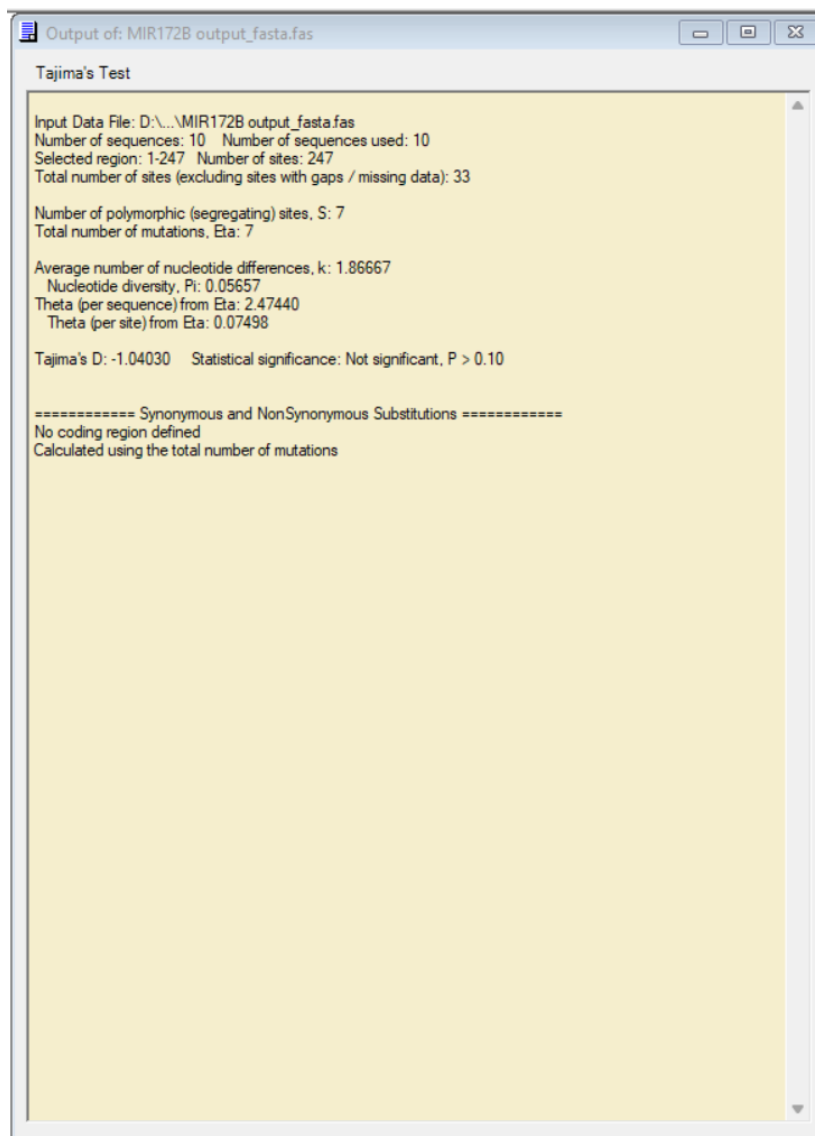

**Figure S3.** Screenshot of Tajima's test conducted on *MIR172B* sequences from *Oryza* spp, other poaceae members and Arabidopsis. A total of 10 sequences were included in the study.

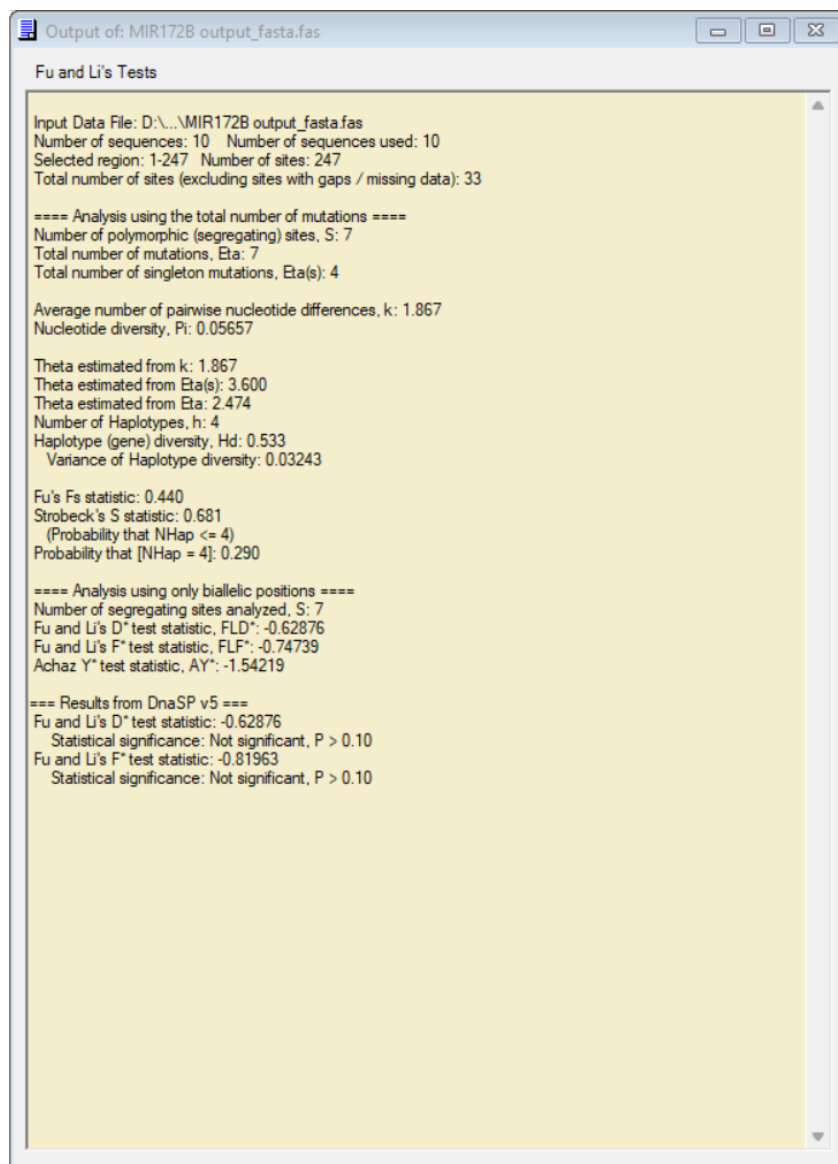

**Figure S4.** Screenshot of Fu and Li's test conducted on *MIR172B* sequences from *Oryza* spp, other poaceae members and Arabidopsis. A total of 10 sequences were included in the study.

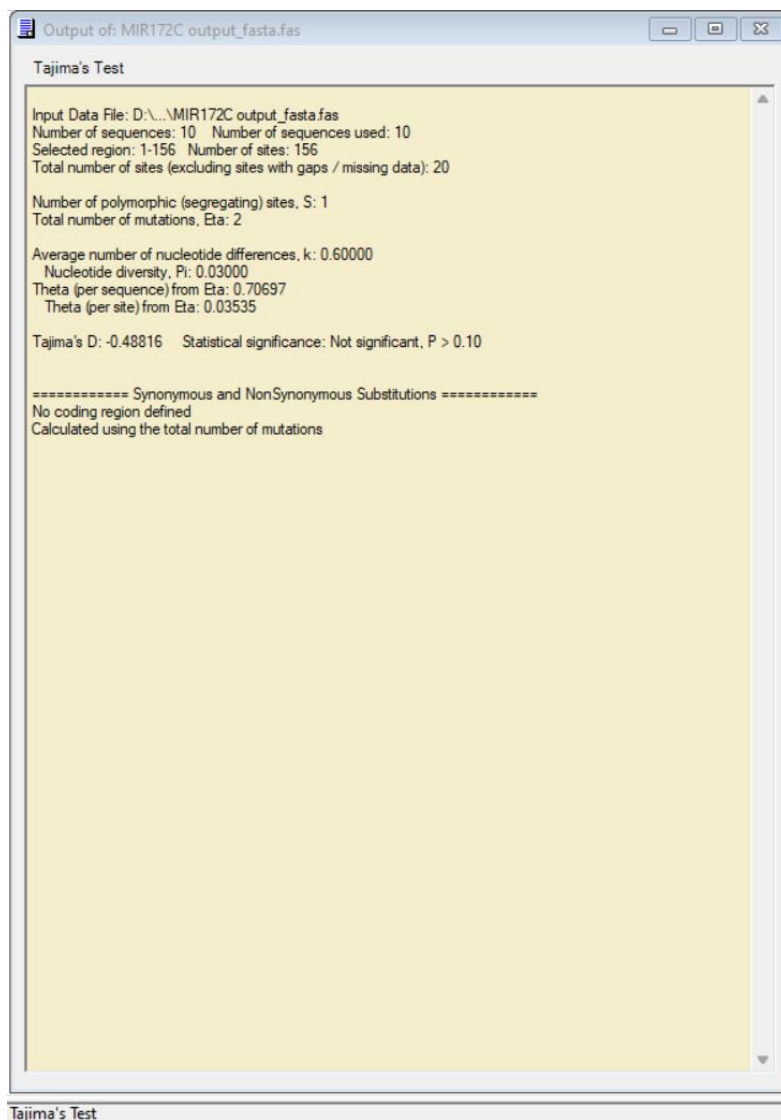

**Figure S5.** Screenshot of Tajima's test conducted on *MIR172C* sequences from *Oryza* spp, other poaceae members and Arabidopsis. A total of 10 sequences were included in the study.



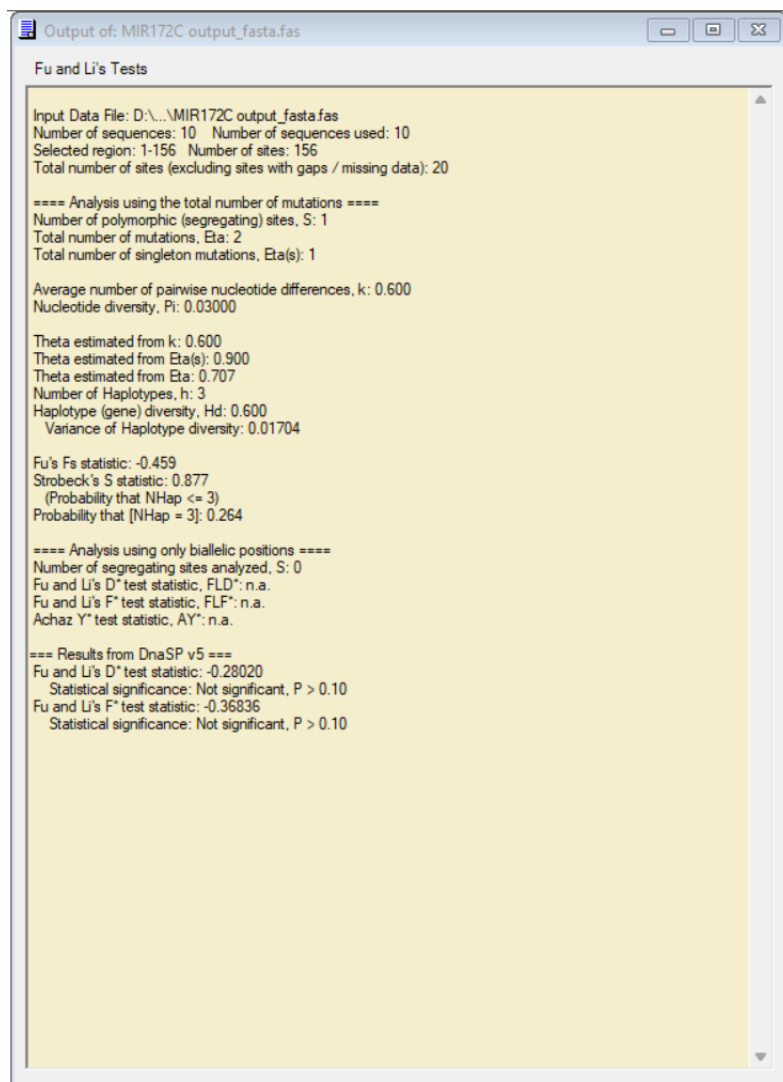

**Figure S6.** Screenshot of Fu and Li's test conducted on *MIR172C* sequences from *Oryza* spp, other poaceae members and *Arabidopsis*. A total of 10 sequences were included in the study.

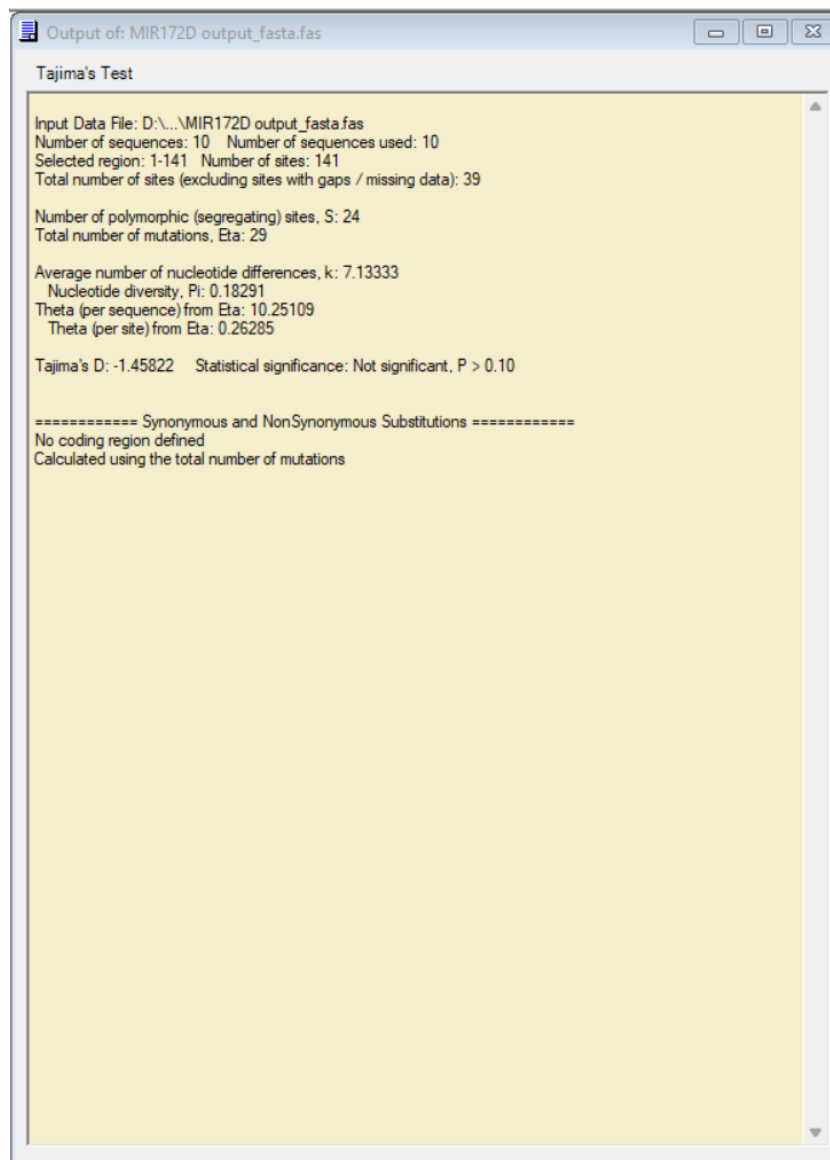

**Figure S7.** Screenshot of Tajima's test conducted on *MIR172D* sequences from *Oryza* spp, other poaceae members and Arabidopsis. A total of 10 sequences were included in the study.

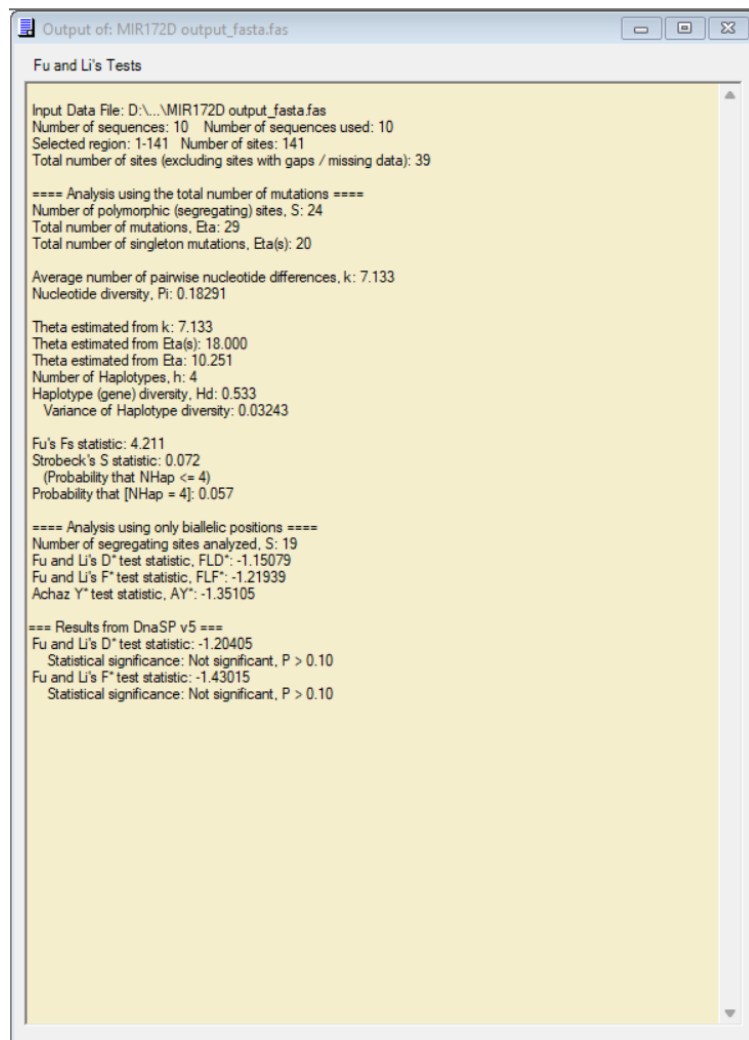

**Figure S8.** Screenshot of Fu and Li's test conducted on *MIR172D* sequences from *Oryza* spp, other poaceae members and *Arabidopsis*. A total of 10 sequences were included in the study.

| Duplication depth | Reference chromosome | Collinear blocks |
|-------------------|----------------------|------------------|
| 0                 | Sequence24Ob2g       |                  |
| 1                 | Sequence25Ob2g       | Sequence46Og2g   |
| 1                 | Sequence26Ob2g       | Sequence47Og2g   |
| 1                 | Sequence27Ob2g       | Sequence48Og2g   |
| 1                 | Sequence28Ob2g       | Sequence49Og2g   |
| 1                 | Sequence29Ob2g       | Sequence50Og2g   |
| 1                 | Sequence30Ob2g       | Sequence51Og2g   |
| 1                 | Sequence31Ob2g       |                  |
| 1                 | Sequence32Ob2g       | Sequence53Og2g   |
| 1                 | Sequence33Ob2g       | Sequence55Og2g   |
| 1                 | Sequence34Ob2g       | Sequence57Og2g   |
| 1                 | Sequence35Ob2g       | Sequence58Og2g   |
| 1                 | Sequence36Ob2g       | Sequence59Og2g   |
| 1                 | Sequence37Ob2g       | Sequence60Og2g   |
| 1                 | Sequence38Ob2g       | Sequence61Og2g   |
| 1                 | Sequence39Ob2g       | Sequence62Og2g   |
| 1                 | Sequence40Ob2g       | Sequence63Og2g   |
| 1                 | Sequence41Ob2g       | Sequence64Og2g   |
| 1                 | Sequence42Ob2g       | Sequence65Og2g   |
| 1                 | Sequence43Ob2g       | Sequence66Og2g   |
| 1                 | Sequence44Ob2g       | Sequence67Og2g   |
| 1                 | Sequence45Ob2g       | Sequence68Og2g   |

**Figure S9:** Synteny block diagram for *MIR172A* with *Oryza barthii* as reference. The first column shows duplication depth at each gene locus, second column shows the genes in reference chromosomes and the following is aligned collinear blocks where only match genes are displayed. The alignment among non-anchor genes is discarded in the output and denoted by ‘||’ in the multi-alignment of gene orders. Ob2- *Oryza barthii* chr 2, Og2- *Oryza glaberrima* chr 2.

| Duplication depth | Reference chromosome | Collinear blocks |
|-------------------|----------------------|------------------|
| 1                 | Sequence46Og2g       | Sequence25Ob2g   |
| 1                 | Sequence47Og2g       | Sequence26Ob2g   |
| 1                 | Sequence48Og2g       | Sequence27Ob2g   |
| 1                 | Sequence49Og2g       | Sequence28Ob2g   |
| 1                 | Sequence50Og2g       | Sequence29Ob2g   |
| 1                 | Sequence51Og2g       | Sequence30Ob2g   |
| 1                 | Sequence52Og2g       |                  |
| 1                 | Sequence53Og2g       | Sequence32Ob2g   |
| 1                 | Sequence54Og2g       |                  |
| 1                 | Sequence55Og2g       | Sequence33Ob2g   |
| 1                 | Sequence56Og2g       |                  |
| 1                 | Sequence57Og2g       | Sequence34Ob2g   |
| 1                 | Sequence58Og2g       | Sequence35Ob2g   |
| 1                 | Sequence59Og2g       | Sequence36Ob2g   |
| 1                 | Sequence60Og2g       | Sequence37Ob2g   |
| 1                 | Sequence61Og2g       | Sequence38Ob2g   |
| 1                 | Sequence62Og2g       | Sequence39Ob2g   |
| 1                 | Sequence63Og2g       | Sequence40Ob2g   |
| 1                 | Sequence64Og2g       | Sequence41Ob2g   |
| 1                 | Sequence65Og2g       | Sequence42Ob2g   |
| 1                 | Sequence66Og2g       | Sequence43Ob2g   |
| 1                 | Sequence67Og2g       | Sequence44Ob2g   |
| 1                 | Sequence68Og2g       | Sequence45Ob2g   |

**Figure S10:** Synteny block diagram for *MIR172A* with *Oryza glaberrima* as reference. The first column shows duplication depth at each gene locus, second column shows the genes in reference chromosomes and the following is aligned collinear blocks where only match genes are displayed. The alignment among non-anchor genes is discarded in the output and denoted by '||' in the multi-alignment of gene orders. ob2- *Oryza barthii* chr 2, og2- *Oryza glaberrima* chr 2.

| Duplication depth | Reference chromosome | Collinear blocks |                |                 |                 |
|-------------------|----------------------|------------------|----------------|-----------------|-----------------|
| 1                 | Sequence69Ou9g       | Sequence89Or9g   |                |                 |                 |
| 1                 | Sequence70Ou9g       | Sequence90Or9g   |                |                 |                 |
| 2                 | Sequence71Ou9g       |                  | Sequence5Os9g  |                 |                 |
| 2                 | Sequence72Ou9g       |                  |                |                 |                 |
| 4                 | Sequence73Ou9g       | Sequence91Or9g   | Sequence7Os9g  | Sequence119Oa9g | Sequence147Op9g |
| 4                 | Sequence74Ou9g       | Sequence92Or9g   | Sequence8Os9g  | Sequence121Oa9g | Sequence148Op9g |
| 4                 | Sequence75Ou9g       | Sequence93Or9g   | Sequence9Os9g  | Sequence122Oa9g | Sequence149Op9g |
| 4                 | Sequence76Ou9g       | Sequence94Or9g   | Sequence12Os9g | Sequence124Oa9g | Sequence150Op9g |
| 4                 | Sequence77Ou9g       |                  |                |                 |                 |
| 4                 | Sequence78Ou9g       |                  |                |                 |                 |
| 4                 | Sequence79Ou9g       | Sequence99Or9g   | Sequence15Os9g | Sequence125Oa9g | Sequence151Op9g |
| 4                 | Sequence80Ou9g       | Sequence100Or9g  | Sequence17Os9g | Sequence126Oa9g | Sequence152Op9g |
| 4                 | Sequence81Ou9g       | Sequence101Or9g  | Sequence18Os9g |                 |                 |
| 4                 | Sequence82Ou9g       | Sequence102Or9g  | Sequence19Os9g | Sequence129Oa9g | Sequence154Op9g |
| 4                 | Sequence83Ou9g       | Sequence103Or9g  | Sequence20Os9g | Sequence130Oa9g | Sequence155Op9g |
| 4                 | Sequence84Ou9g       | Sequence104Or9g  | Sequence21Os9g | Sequence131Oa9g | Sequence156Op9g |
| 4                 | Sequence85Ou9g       | Sequence105Or9g  | Sequence22Os9g | Sequence132Oa9g | Sequence157Op9g |

**Figure S11:** Synteny block diagram for *MIR172A* with *Oryza glumaepatula* as reference. The first column shows duplication depth at each gene locus, second column shows the genes in reference chromosomes and the following is aligned collinear blocks where only match genes are displayed. The alignment among non-anchor genes is discarded in the output and denoted by '||' in the multi-alignment of gene orders. Os9- *Oryza sativa* chr 9, Ou9- *Oryza glumaepatula* chr 9, Or9- *Oryza rufipogon* chr 9, Oa9- *Oryza brachyantha* chr 9, Op9- *Oryza punctata* chr 9.

| Duplication depth | Reference chromosome | Collinear blocks |                |                 |                 |
|-------------------|----------------------|------------------|----------------|-----------------|-----------------|
| 1                 | Sequence86Or9g       | Sequence4Os9g    |                |                 |                 |
| 1                 | Sequence87Or9g       |                  |                |                 |                 |
| 1                 | Sequence88Or9g       | Sequence5Os9g    |                |                 |                 |
| 2                 | Sequence89Or9g       | Sequence6Os9g    | Sequence69Ou9g |                 |                 |
| 2                 | Sequence90Or9g       |                  | Sequence70Ou9g |                 |                 |
| 4                 | Sequence91Or9g       | Sequence7Os9g    | Sequence73Ou9g | Sequence147Op9g | Sequence119Oa9g |
| 4                 | Sequence92Or9g       | Sequence8Os9g    | Sequence74Ou9g | Sequence148Op9g | Sequence121Oa9g |
| 4                 | Sequence93Or9g       | Sequence9Os9g    | Sequence75Ou9g | Sequence149Op9g | Sequence122Oa9g |
| 4                 | Sequence94Or9g       |                  | Sequence76Ou9g |                 |                 |
| 4                 | Sequence95Or9g       |                  |                |                 |                 |
| 4                 | Sequence96Or9g       | Sequence10Os9g   |                | Sequence150Op9g | Sequence124Oa9g |
| 4                 | Sequence97Or9g       | Sequence12Os9g   |                |                 |                 |
| 4                 | Sequence98Or9g       | Sequence13Os9g   |                |                 |                 |
| 4                 | Sequence99Or9g       | Sequence15Os9g   | Sequence79Ou9g | Sequence151Op9g | Sequence125Oa9g |
| 4                 | Sequence100Or9g      | Sequence17Os9g   | Sequence80Ou9g | Sequence152Op9g | Sequence126Oa9g |
| 4                 | Sequence101Or9g      | Sequence18Os9g   | Sequence81Ou9g |                 |                 |
| 4                 | Sequence102Or9g      | Sequence19Os9g   | Sequence82Ou9g | Sequence154Op9g | Sequence129Oa9g |
| 4                 | Sequence103Or9g      | Sequence20Os9g   | Sequence83Ou9g | Sequence155Op9g | Sequence130Oa9g |
| 4                 | Sequence104Or9g      | Sequence21Os9g   | Sequence84Ou9g | Sequence156Op9g | Sequence131Oa9g |
| 4                 | Sequence105Or9g      | Sequence22Os9g   | Sequence85Ou9g | Sequence157Op9g | Sequence132Oa9g |
| 2                 | Sequence106Or9g      | Sequence23Os9g   |                |                 | Sequence133Oa9g |
| 0                 | Sequence107Or9g      |                  |                |                 |                 |
| 0                 | Sequence108Or9g      |                  |                |                 |                 |

**Figure S12:** Synteny block diagram for *MIR172A* with *Oryza rufipogon* as reference. The first column shows duplication depth at each gene locus, second column shows the genes in reference chromosomes and the following is aligned collinear blocks where only match genes are displayed. The alignment among non-anchor genes is discarded in the output and denoted by '||' in the multi-alignment of gene orders. Os9- *Oryza sativa* chr 9, Ou9- *Oryza glumaepatula* chr 9, Or9- *Oryza rufipogon* chr 9, Oa9- *Oryza brachyantha* chr 9, Op9- *Oryza punctata* chr 9.

| Duplication depth | Reference chromosome | Collinear blocks |                |                 |                |
|-------------------|----------------------|------------------|----------------|-----------------|----------------|
| 1                 | Sequence109Oa9g      | Sequence136Op9g  |                |                 |                |
| 1                 | Sequence110Oa9g      | Sequence137Op9g  |                |                 |                |
| 1                 | Sequence111Oa9g      | Sequence138Op9g  |                |                 |                |
| 1                 | Sequence112Oa9g      | Sequence139Op9g  |                |                 |                |
| 1                 | Sequence113Oa9g      |                  |                |                 |                |
| 1                 | Sequence114Oa9g      | Sequence141Op9g  |                |                 |                |
| 1                 | Sequence115Oa9g      | Sequence142Op9g  |                |                 |                |
| 2                 | Sequence116Oa9g      | Sequence143Op9g  | Sequence1Os9g  |                 |                |
| 2                 | Sequence117Oa9g      | Sequence145Op9g  | Sequence3Os9g  |                 |                |
| 2                 | Sequence118Oa9g      |                  |                |                 |                |
| 4                 | Sequence119Oa9g      |                  |                | Sequence91Or9g  | Sequence73Ou9g |
| 4                 | Sequence120Oa9g      |                  |                |                 |                |
| 4                 | Sequence121Oa9g      | Sequence148Op9g  | Sequence8Os9g  | Sequence92Or9g  | Sequence74Ou9g |
| 4                 | Sequence122Oa9g      | Sequence149Op9g  | Sequence9Os9g  | Sequence93Or9g  | Sequence75Ou9g |
| 4                 | Sequence123Oa9g      |                  |                |                 |                |
| 4                 | Sequence124Oa9g      | Sequence150Op9g  | Sequence10Os9g | Sequence96Or9g  | Sequence76Ou9g |
| 4                 | Sequence125Oa9g      | Sequence151Op9g  | Sequence15Os9g | Sequence99Or9g  | Sequence79Ou9g |
| 4                 | Sequence126Oa9g      | Sequence152Op9g  | Sequence17Os9g | Sequence100Or9g | Sequence80Ou9g |
| 4                 | Sequence127Oa9g      |                  |                |                 |                |
| 4                 | Sequence128Oa9g      |                  |                |                 |                |
| 4                 | Sequence129Oa9g      | Sequence154Op9g  | Sequence19Os9g | Sequence102Or9g | Sequence82Ou9g |
| 4                 | Sequence130Oa9g      | Sequence155Op9g  | Sequence20Os9g | Sequence103Or9g | Sequence83Ou9g |
| 4                 | Sequence131Oa9g      | Sequence156Op9g  | Sequence21Os9g | Sequence104Or9g | Sequence84Ou9g |
| 4                 | Sequence132Oa9g      | Sequence157Op9g  | Sequence22Os9g | Sequence105Or9g | Sequence85Ou9g |
| 2                 | Sequence133Oa9g      |                  | Sequence23Os9g | Sequence106Or9g |                |
| 0                 | Sequence134Oa9g      |                  |                |                 |                |
| 0                 | Sequence135Oa9g      |                  |                |                 |                |

**Figure S13:** Synteny block diagram for *MIR172A* with *Oryza brachyantha* as reference. The first column shows duplication depth at each gene locus, second column shows the genes in reference chromosomes and the following is aligned collinear blocks where only match genes are displayed. The alignment among non-anchor genes is discarded in the output and denoted by '||' in the multi-alignment of gene orders. Os9- *Oryza sativa* chr 9, Ou9- *Oryza glumaepatula* chr 9, Or9- *Oryza rufipogon* chr 9, Oa9- *Oryza brachyantha* chr 9, Op9- *Oryza punctata* chr 9.



| Duplication depth | Reference chromosome | Collinear blocks |                |                |                 |  |
|-------------------|----------------------|------------------|----------------|----------------|-----------------|--|
| 1                 | Sequence136Op9g      | Sequence109Oa9g  |                |                |                 |  |
| 1                 | Sequence137Op9g      | Sequence110Oa9g  |                |                |                 |  |
| 1                 | Sequence138Op9g      | Sequence111Oa9g  |                |                |                 |  |
| 1                 | Sequence139Op9g      | Sequence112Oa9g  |                |                |                 |  |
| 1                 | Sequence140Op9g      |                  |                |                |                 |  |
| 1                 | Sequence141Op9g      | Sequence114Oa9g  |                |                |                 |  |
| 1                 | Sequence142Op9g      | Sequence115Oa9g  |                |                |                 |  |
| 2                 | Sequence143Op9g      | Sequence116Oa9g  | Sequence1Os9g  |                |                 |  |
| 2                 | Sequence144Op9g      |                  |                |                |                 |  |
| 2                 | Sequence145Op9g      | Sequence117Oa9g  | Sequence3Os9g  |                |                 |  |
| 2                 | Sequence146Op9g      |                  |                |                |                 |  |
| 4                 | Sequence147Op9g      |                  |                | Sequence73Ou9g | Sequence91Or9g  |  |
| 4                 | Sequence148Op9g      | Sequence121Oa9g  | Sequence8Os9g  | Sequence74Ou9g | Sequence92Or9g  |  |
| 4                 | Sequence149Op9g      | Sequence122Oa9g  | Sequence9Os9g  | Sequence75Ou9g | Sequence93Or9g  |  |
| 4                 | Sequence150Op9g      | Sequence124Oa9g  | Sequence10Os9g | Sequence76Ou9g | Sequence96Or9g  |  |
| 4                 | Sequence151Op9g      | Sequence125Oa9g  | Sequence15Os9g | Sequence79Ou9g | Sequence99Or9g  |  |
| 4                 | Sequence152Op9g      | Sequence126Oa9g  | Sequence17Os9g | Sequence80Ou9g | Sequence100Or9g |  |
| 4                 | Sequence153Op9g      |                  |                |                |                 |  |
| 4                 | Sequence154Op9g      | Sequence129Oa9g  | Sequence19Os9g | Sequence82Ou9g | Sequence102Or9g |  |
| 4                 | Sequence155Op9g      | Sequence130Oa9g  | Sequence20Os9g | Sequence83Ou9g | Sequence103Or9g |  |
| 4                 | Sequence156Op9g      | Sequence131Oa9g  | Sequence21Os9g | Sequence84Ou9g | Sequence104Or9g |  |
| 4                 | Sequence157Op9g      | Sequence132Oa9g  | Sequence22Os9g | Sequence85Ou9g | Sequence105Or9g |  |

**Figure S14:** Synteny block diagram for *MIR172A* with *Oryza punctata* as reference. The first column shows duplication depth at each gene locus, second column shows the genes in reference chromosomes and the following is aligned collinear blocks where only match genes are displayed. The alignment among non-anchor genes is discarded in the output and denoted by ‘||’ in the multi-alignment of gene orders. Os9- *Oryza sativa* chr 9, Ou9- *Oryza glumaepatula* chr 9, Or9- *Oryza rufipogon* chr 9, Oa9- *Oryza brachyantha* chr 9, Op9- *Oryza punctata* chr 9.

| Duplication depth | Reference chromosome | Collinear blocks |
|-------------------|----------------------|------------------|
| 0                 | Sequence158Sb9g      |                  |
| 0                 | Sequence159Sb9g      |                  |
| 0                 | Sequence160Sb9g      |                  |
| 0                 | Sequence161Sb9g      |                  |
| 0                 | Sequence162Sb9g      |                  |
| 0                 | Sequence163Sb9g      |                  |
| 0                 | Sequence164Sb9g      |                  |
| 0                 | Sequence165Sb9g      |                  |
| 0                 | Sequence166Sb9g      |                  |
| 0                 | Sequence167Sb9g      |                  |
| 0                 | Sequence168Sb9g      |                  |
| 0                 | Sequence169Sb9g      |                  |
| 0                 | Sequence170Sb9g      |                  |
| 0                 | Sequence171Sb9g      |                  |
| 0                 | Sequence172Sb9g      |                  |
| 0                 | Sequence173Sb9g      |                  |
| 0                 | Sequence174Sb9g      |                  |
| 0                 | Sequence175Sb9g      |                  |
| 0                 | Sequence176Sb9g      |                  |
| 0                 | Sequence177Sb9g      |                  |

**Figure S15:** Synteny block diagram for *MIR172A* with *Sorghum bicolor* as reference. The first column shows duplication depth at each gene locus, second column shows the genes in reference chromosomes and the following is aligned collinear blocks where only match genes are displayed. The alignment among non-anchor genes is discarded in the output and denoted by '||' in the multi-alignment of gene orders. Sb9- *Sorghum bicolor* chr 9.

| Duplication depth | Reference chromosome | Collinear blocks |
|-------------------|----------------------|------------------|
| 0                 | Sequence178Zm7g      |                  |
| 0                 | Sequence179Zm7g      |                  |
| 0                 | Sequence180Zm7g      |                  |
| 0                 | Sequence181Zm7g      |                  |
| 0                 | Sequence182Zm7g      |                  |
| 0                 | Sequence183Zm7g      |                  |
| 0                 | Sequence184Zm7g      |                  |
| 0                 | Sequence185Zm7g      |                  |
| 0                 | Sequence186Zm7g      |                  |
| 0                 | Sequence187Zm7g      |                  |
| 0                 | Sequence188Zm7g      |                  |
| 0                 | Sequence189Zm7g      |                  |
| 0                 | Sequence190Zm7g      |                  |
| 0                 | Sequence191Zm7g      |                  |

**Figure S16:** Synteny block diagram for *MIR172A* with *Zea mays* as reference. The first column shows duplication depth at each gene locus, second column shows the genes in reference chromosomes and the following is aligned collinear blocks where only match genes are displayed. The alignment among non-anchor genes is discarded in the output and denoted by ‘||’ in the multi-alignment of gene orders. Zm7-*Zea mays* chr 7.

| Duplication depth | Reference chromosome | Collinear blocks |
|-------------------|----------------------|------------------|
| 0                 | Sequence192At2g      |                  |
| 0                 | Sequence193At2g      |                  |
| 0                 | Sequence194At2g      |                  |
| 0                 | Sequence195At2g      |                  |
| 0                 | Sequence196At2g      |                  |
| 0                 | Sequence197At2g      |                  |
| 0                 | Sequence198At2g      |                  |
| 0                 | Sequence199At2g      |                  |
| 0                 | Sequence200At2g      |                  |
| 0                 | Sequence201At2g      |                  |
| 0                 | Sequence202At2g      |                  |
| 0                 | Sequence203At2g      |                  |
| 0                 | Sequence204At2g      |                  |
| 0                 | Sequence205At2g      |                  |
| 0                 | Sequence206At2g      |                  |
| 0                 | Sequence207At2g      |                  |
| 0                 | Sequence208At2g      |                  |
| 0                 | Sequence209At2g      |                  |
| 0                 | Sequence210At2g      |                  |
| 0                 | Sequence211At2g      |                  |
| 0                 | Sequence212At2g      |                  |
| 0                 | Sequence213At2g      |                  |
| 0                 | Sequence214At2g      |                  |
| 0                 | Sequence215At2g      |                  |
| 0                 | Sequence216At2g      |                  |
| 0                 | Sequence217At2g      |                  |
| 0                 | Sequence218At2g      |                  |

**Figure S17:** Synteny block diagram for *MIR172A* with *Arabidopsis thaliana* as reference. The first column shows duplication depth at each gene locus, second column shows the genes in reference chromosomes and the following is aligned collinear blocks where only match genes are displayed. The alignment among non-anchor genes is discarded in the output and denoted by '||' in the multi-alignment of gene orders. At2- *Arabidopsis thaliana* chr 2.

| Duplication depth | Reference chromosome | Collinear blocks |                 |                |                |                |  |
|-------------------|----------------------|------------------|-----------------|----------------|----------------|----------------|--|
| 2                 | Sequence24Ob1g       | Sequence45Og1g   | Sequence107Op1g |                |                |                |  |
| 3                 | Sequence25Ob1g       | Sequence46Og1g   |                 | Sequence81Or1g |                |                |  |
| 4                 | Sequence26Ob1g       | Sequence47Og1g   | Sequence109Op1g | Sequence82Or1g | Sequence1Os1g  |                |  |
| 4                 | Sequence27Ob1g       |                  |                 |                |                |                |  |
| 4                 | Sequence28Ob1g       | Sequence48Og1g   | Sequence112Op1g | Sequence83Or1g | Sequence2Os1g  |                |  |
| 5                 | Sequence29Ob1g       | Sequence49Og1g   |                 | Sequence84Or1g | Sequence5Os1g  | Sequence63Ou1g |  |
| 5                 | Sequence30Ob1g       | Sequence50Og1g   | Sequence115Op1g | Sequence85Or1g | Sequence6Os1g  | Sequence64Ou1g |  |
| 5                 | Sequence31Ob1g       |                  |                 |                | Sequence7Os1g  | Sequence65Ou1g |  |
| 5                 | Sequence32Ob1g       | Sequence52Og1g   | Sequence117Op1g | Sequence87Or1g |                | Sequence66Ou1g |  |
| 5                 | Sequence33Ob1g       |                  |                 |                | Sequence9Os1g  |                |  |
| 5                 | Sequence34Ob1g       |                  |                 | Sequence88Or1g | Sequence10Os1g |                |  |
| 5                 | Sequence35Ob1g       | Sequence54Og1g   | Sequence118Op1g | Sequence89Or1g | Sequence14Os1g | Sequence70Ou1g |  |
| 5                 | Sequence36Ob1g       | Sequence55Og1g   |                 | Sequence90Or1g | Sequence15Os1g | Sequence71Ou1g |  |
| 5                 | Sequence37Ob1g       |                  |                 |                |                |                |  |
| 5                 | Sequence38Ob1g       |                  |                 |                |                |                |  |
| 5                 | Sequence39Ob1g       |                  |                 |                | Sequence17Os1g | Sequence74Ou1g |  |
| 5                 | Sequence40Ob1g       | Sequence57Og1g   | Sequence124Op1g | Sequence93Or1g | Sequence18Os1g | Sequence75Ou1g |  |
| 5                 | Sequence41Ob1g       | Sequence58Og1g   | Sequence125Op1g | Sequence94Or1g |                | Sequence76Ou1g |  |
| 5                 | Sequence42Ob1g       | Sequence59Og1g   | Sequence129Op1g | Sequence95Or1g | Sequence21Os1g | Sequence78Ou1g |  |
| 1                 | Sequence43Ob1g       | Sequence60Og1g   |                 |                |                |                |  |
| 0                 | Sequence44Ob1g       |                  |                 |                |                |                |  |

**Figure S18:** Synteny block diagram for *MIR172B* with *Oryza barthii* as reference. The first column shows duplication depth at each gene locus, second column shows the genes in reference chromosomes and the following is aligned collinear blocks where only match genes are displayed. The alignment among non-anchor genes is discarded in the output and denoted by ‘|’ in the multi-alignment of gene orders. Os1- *Oryza sativa* chr 1, Ob1- *Oryza barthii* chr 1, Og1- *Oryza glaberrima* chr 1, Ou1- *Oryza glumaepatula* chr 1, Or1- *Oryza rufipogon* chr 1, Op1- *Oryza punctata* chr 1.

| Duplication depth | Reference chromosome | Collinear blocks |                |                |                |                |                |
|-------------------|----------------------|------------------|----------------|----------------|----------------|----------------|----------------|
| 2                 | Sequence45Og1g       | Sequence107Op1g  | Sequence24Ob1g |                |                |                |                |
| 3                 | Sequence46Og1g       |                  | Sequence25Ob1g | Sequence81Or1g |                |                |                |
| 4                 | Sequence47Og1g       | Sequence109Op1g  | Sequence26Ob1g | Sequence82Or1g | Sequence1Os1g  |                |                |
| 4                 | Sequence48Og1g       | Sequence112Op1g  | Sequence28Ob1g | Sequence83Or1g | Sequence2Os1g  |                |                |
| 5                 | Sequence49Og1g       | Sequence113Op1g  | Sequence29Ob1g | Sequence84Or1g | Sequence5Os1g  | Sequence63Ou1g |                |
| 5                 | Sequence50Og1g       | Sequence115Op1g  | Sequence30Ob1g | Sequence85Or1g | Sequence6Os1g  | Sequence64Ou1g |                |
| 5                 | Sequence51Og1g       |                  |                |                |                |                |                |
| 5                 | Sequence52Og1g       | Sequence117Op1g  | Sequence32Ob1g | Sequence87Or1g |                |                | Sequence66Ou1g |
| 5                 | Sequence53Og1g       |                  |                |                | Sequence11Os1g | Sequence67Ou1g |                |
| 5                 | Sequence54Og1g       | Sequence118Op1g  | Sequence35Ob1g | Sequence89Or1g | Sequence14Os1g | Sequence70Ou1g |                |
| 5                 | Sequence55Og1g       | Sequence119Op1g  | Sequence36Ob1g | Sequence90Or1g | Sequence15Os1g | Sequence71Ou1g |                |
| 5                 | Sequence56Og1g       |                  |                |                |                |                |                |
| 5                 | Sequence57Og1g       | Sequence124Op1g  | Sequence40Ob1g | Sequence93Or1g | Sequence18Os1g | Sequence75Ou1g |                |
| 5                 | Sequence58Og1g       | Sequence125Op1g  | Sequence41Ob1g | Sequence94Or1g | Sequence19Os1g | Sequence76Ou1g |                |
| 5                 | Sequence59Og1g       | Sequence129Op1g  | Sequence42Ob1g | Sequence95Or1g | Sequence21Os1g | Sequence78Ou1g |                |
| 1                 | Sequence60Og1g       |                  | Sequence43Ob1g |                |                |                |                |
| 0                 | Sequence61Og1g       |                  |                |                |                |                |                |
| 0                 | Sequence62Og1g       |                  |                |                |                |                |                |

**Figure S19:** Synteny block diagram for *MIR172B* with *Oryza glaberrima* as reference. The first column shows duplication depth at each gene locus, second column shows the genes in reference chromosomes and the following is aligned collinear blocks where only match genes are displayed. The alignment among non-anchor genes is discarded in the output and denoted by ‘||’ in the multi-alignment of gene orders. Os1- *Oryza sativa* chr 1, Ob1- *Oryza barthii* chr 1, Og1- *Oryza glaberrima* chr 1, Ou1- *Oryza glumaepatula* chr 1, Or1- *Oryza rufipogon* chr 1, Op1- *Oryza punctata* chr 1.

| Duplication depth | Reference chromosome | Collinear blocks |                 |                |                |                |  |
|-------------------|----------------------|------------------|-----------------|----------------|----------------|----------------|--|
| 5                 | Sequence63Ou1g       | Sequence49Og1g   | Sequence113Op1g | Sequence29Ob1g | Sequence84Or1g | Sequence5Os1g  |  |
| 5                 | Sequence64Ou1g       | Sequence50Og1g   | Sequence115Op1g | Sequence30Ob1g | Sequence85Or1g | Sequence6Os1g  |  |
| 5                 | Sequence65Ou1g       |                  |                 | Sequence31Ob1g |                | Sequence7Os1g  |  |
| 5                 | Sequence66Ou1g       | Sequence52Og1g   | Sequence117Op1g | Sequence32Ob1g | Sequence87Or1g |                |  |
| 5                 | Sequence67Ou1g       | Sequence53Og1g   |                 |                |                | Sequence11Os1g |  |
| 5                 | Sequence68Ou1g       |                  |                 |                |                |                |  |
| 5                 | Sequence69Ou1g       |                  |                 |                |                |                |  |
| 5                 | Sequence70Ou1g       | Sequence54Og1g   | Sequence118Op1g | Sequence35Ob1g | Sequence89Or1g | Sequence14Os1g |  |
| 5                 | Sequence71Ou1g       | Sequence55Og1g   | Sequence119Op1g | Sequence36Ob1g | Sequence90Or1g | Sequence15Os1g |  |
| 5                 | Sequence72Ou1g       |                  |                 |                |                |                |  |
| 5                 | Sequence73Ou1g       |                  |                 |                |                |                |  |
| 5                 | Sequence74Ou1g       |                  |                 | Sequence39Ob1g |                | Sequence17Os1g |  |
| 5                 | Sequence75Ou1g       | Sequence57Og1g   | Sequence124Op1g | Sequence40Ob1g | Sequence93Or1g | Sequence18Os1g |  |
| 5                 | Sequence76Ou1g       | Sequence58Og1g   | Sequence125Op1g | Sequence41Ob1g | Sequence94Or1g | Sequence19Os1g |  |
| 5                 | Sequence77Ou1g       |                  |                 |                |                |                |  |
| 5                 | Sequence78Ou1g       | Sequence59Og1g   | Sequence129Op1g | Sequence42Ob1g | Sequence95Or1g | Sequence21Os1g |  |
| 2                 | Sequence79Ou1g       |                  |                 |                | Sequence96Or1g |                |  |
| 2                 | Sequence80Ou1g       |                  | Sequence131Op1g |                | Sequence97Or1g |                |  |

**Figure S20:** Synteny block diagram for *MIR172B* with *Oryza glumaepatula* as reference. The first column shows duplication depth at each gene locus, second column shows the genes in reference chromosomes and the following is aligned collinear blocks where only match genes are displayed. The alignment among non-anchor genes is discarded in the output and denoted by '||' in the multi-alignment of gene orders. Os1- *Oryza sativa* chr 1, Ob1- *Oryza barthii* chr 1, Og1- *Oryza glaberrima* chr 1, Ou1- *Oryza glumaepatula* chr 1, Or1- *Oryza rufipogon* chr 1, Op1- *Oryza punctata* chr 1.

| Duplication depth | Reference chromosome | Collinear blocks |                |                |                 |                |  |
|-------------------|----------------------|------------------|----------------|----------------|-----------------|----------------|--|
| 2                 | Sequence81Or1g       | Sequence25Ob1g   | Sequence46Og1g |                |                 |                |  |
| 4                 | Sequence82Or1g       | Sequence26Ob1g   | Sequence47Og1g | Sequence1Os1g  | Sequence109Op1g |                |  |
| 4                 | Sequence83Or1g       | Sequence28Ob1g   | Sequence48Og1g | Sequence2Os1g  | Sequence112Op1g |                |  |
| 5                 | Sequence84Or1g       | Sequence29Ob1g   | Sequence49Og1g | Sequence5Os1g  | Sequence113Op1g | Sequence63Ou1g |  |
| 5                 | Sequence85Or1g       | Sequence30Ob1g   | Sequence50Og1g | Sequence6Os1g  | Sequence116Op1g | Sequence64Ou1g |  |
| 5                 | Sequence86Or1g       |                  |                |                |                 |                |  |
| 5                 | Sequence87Or1g       | Sequence32Ob1g   | Sequence52Og1g | Sequence8Os1g  |                 | Sequence66Ou1g |  |
| 5                 | Sequence88Or1g       | Sequence34Ob1g   |                |                |                 |                |  |
| 5                 | Sequence89Or1g       | Sequence35Ob1g   | Sequence54Og1g | Sequence14Os1g |                 | Sequence70Ou1g |  |
| 5                 | Sequence90Or1g       | Sequence36Ob1g   | Sequence55Og1g | Sequence15Os1g | Sequence119Op1g | Sequence71Ou1g |  |
| 5                 | Sequence91Or1g       |                  |                |                |                 |                |  |
| 5                 | Sequence92Or1g       |                  |                |                |                 |                |  |
| 5                 | Sequence93Or1g       | Sequence40Ob1g   | Sequence57Og1g | Sequence18Os1g | Sequence124Op1g | Sequence75Ou1g |  |
| 5                 | Sequence94Or1g       | Sequence41Ob1g   | Sequence58Og1g | Sequence19Os1g | Sequence125Op1g | Sequence76Ou1g |  |
| 5                 | Sequence95Or1g       | Sequence42Ob1g   | Sequence59Og1g | Sequence21Os1g |                 | Sequence78Ou1g |  |
| 2                 | Sequence96Or1g       |                  |                |                | Sequence127Op1g | Sequence79Ou1g |  |
| 2                 | Sequence97Or1g       |                  |                |                | Sequence131Op1g | Sequence80Ou1g |  |

**Figure S21:** Synteny block diagram for *MIR172B* with *Oryza rufipogon* as reference. The first column shows duplication depth at each gene locus, second column shows the genes in reference chromosomes and the following is aligned collinear blocks where only match genes are displayed. The alignment among non-anchor genes is discarded in the output and denoted by '||' in the multi-alignment of gene orders. Os1- *Oryza sativa* chr 1, Ob1- *Oryza barthii* chr 1, Og1- *Oryza glaberrima* chr 1, Ou1- *Oryza glumaepatula* chr 1, Or1- *Oryza rufipogon* chr 1, Op1- *Oryza punctata* chr 1.



| Duplication depth | Reference chromosome | Collinear blocks |
|-------------------|----------------------|------------------|
| 0                 | Sequence98Oa1g       |                  |
| 0                 | Sequence99Oa1g       |                  |
| 0                 | Sequence100Oa1g      |                  |
| 0                 | Sequence101Oa1g      |                  |
| 0                 | Sequence102Oa1g      |                  |
| 0                 | Sequence103Oa1g      |                  |
| 0                 | Sequence104Oa1g      |                  |
| 0                 | Sequence105Oa1g      |                  |
| 0                 | Sequence106Oa1g      |                  |

**Figure S22:** Synteny block diagram for *MIR172B* with *Oryza brachyantha* as reference. The first column shows duplication depth at each gene locus, second column shows the genes in reference chromosomes and the following is aligned collinear blocks where only match genes are displayed. The alignment among non-anchor genes is discarded in the output and denoted by ‘||’ in the multi-alignment of gene orders. Oa1- *Oryza brachyantha* chr 1.

| Duplication depth | Reference chromosome | Collinear blocks |                |                |                |                |
|-------------------|----------------------|------------------|----------------|----------------|----------------|----------------|
| 2                 | Sequence107Op1g      | Sequence24Ob1g   | Sequence45Og1g |                |                |                |
| 2                 | Sequence108Op1g      |                  |                |                |                |                |
| 3                 | Sequence109Op1g      | Sequence26Ob1g   | Sequence47Og1g | Sequence82Or1g |                |                |
| 3                 | Sequence110Op1g      |                  |                |                |                |                |
| 4                 | Sequence111Op1g      |                  |                |                | Sequence1Os1g  |                |
| 4                 | Sequence112Op1g      | Sequence28Ob1g   | Sequence48Og1g | Sequence83Or1g | Sequence2Os1g  |                |
| 5                 | Sequence113Op1g      |                  | Sequence49Og1g | Sequence84Or1g | Sequence5Os1g  | Sequence63Ou1g |
| 5                 | Sequence114Op1g      |                  |                |                |                |                |
| 5                 | Sequence115Op1g      | Sequence30Ob1g   | Sequence50Og1g |                | Sequence6Os1g  | Sequence64Ou1g |
| 5                 | Sequence116Op1g      |                  |                | Sequence85Or1g |                |                |
| 5                 | Sequence117Op1g      | Sequence32Ob1g   | Sequence52Og1g |                | Sequence8Os1g  | Sequence66Ou1g |
| 5                 | Sequence118Op1g      | Sequence35Ob1g   | Sequence54Og1g |                | Sequence14Os1g | Sequence70Ou1g |
| 5                 | Sequence119Op1g      |                  | Sequence55Og1g | Sequence90Or1g | Sequence15Os1g | Sequence71Ou1g |
| 5                 | Sequence120Op1g      |                  |                |                |                |                |
| 5                 | Sequence121Op1g      |                  |                |                |                |                |
| 5                 | Sequence122Op1g      |                  |                |                |                |                |
| 5                 | Sequence123Op1g      |                  |                |                |                |                |
| 5                 | Sequence124Op1g      | Sequence40Ob1g   | Sequence57Og1g | Sequence93Or1g |                | Sequence75Ou1g |
| 5                 | Sequence125Op1g      | Sequence41Ob1g   | Sequence58Og1g | Sequence94Or1g | Sequence19Os1g | Sequence76Ou1g |
| 5                 | Sequence126Op1g      |                  |                |                |                |                |
| 5                 | Sequence127Op1g      |                  |                | Sequence96Or1g |                |                |
| 5                 | Sequence128Op1g      |                  |                |                |                |                |
| 5                 | Sequence129Op1g      | Sequence42Ob1g   | Sequence59Og1g |                | Sequence21Os1g | Sequence78Ou1g |
| 2                 | Sequence130Op1g      |                  |                |                |                |                |
| 2                 | Sequence131Op1g      |                  |                | Sequence97Or1g |                | Sequence80Ou1g |

**Figure S23:** Synteny block diagram for *MIR172B* with *Oryza punctata* as reference. The first column shows duplication depth at each gene locus, second column shows the genes in reference chromosomes and the following is aligned collinear blocks where only match genes are displayed. The alignment among non-anchor genes is discarded in the output and denoted by ‘|’ in the multi-alignment of gene orders. Os1- *Oryza sativa* chr 1, Ob1- *Oryza barthii* chr 1, Og1- *Oryza glaberrima* chr 1, Ou1- *Oryza glumaepatula* chr 1, Or1- *Oryza rufipogon* chr 1, Op1- *Oryza punctata* chr 1.

| Duplication depth | Reference chromosome | Collinear blocks |
|-------------------|----------------------|------------------|
| 0                 | Sequence132Sb3g      |                  |
| 0                 | Sequence133Sb3g      |                  |
| 0                 | Sequence134Sb3g      |                  |
| 0                 | Sequence135Sb3g      |                  |
| 0                 | Sequence136Sb3g      |                  |
| 0                 | Sequence137Sb3g      |                  |
| 0                 | Sequence138Sb3g      |                  |
| 0                 | Sequence139Sb3g      |                  |
| 0                 | Sequence140Sb3g      |                  |
| 0                 | Sequence141Sb3g      |                  |
| 0                 | Sequence142Sb3g      |                  |
| 0                 | Sequence143Sb3g      |                  |
| 0                 | Sequence144Sb3g      |                  |
| 0                 | Sequence145Sb3g      |                  |
| 0                 | Sequence146Sb3g      |                  |
| 0                 | Sequence147Sb3g      |                  |
| 0                 | Sequence148Sb3g      |                  |
| 0                 | Sequence149Sb3g      |                  |
| 0                 | Sequence150Sb3g      |                  |
| 0                 | Sequence151Sb3g      |                  |
| 0                 | Sequence152Sb3g      |                  |

**Figure S24:** Synteny block diagram for *MIR172B* with *Sorghum bicolor* as reference. The first column shows duplication depth at each gene locus, second column shows the genes in reference chromosomes and the following is aligned collinear blocks where only match genes are displayed. The alignment among non-anchor genes is discarded in the output and denoted by '||' in the multi-alignment of gene orders. Sb3 - *Sorghum bicolor* chr 3.

| Duplication depth | Reference chromosome | Collinear blocks |
|-------------------|----------------------|------------------|
| 0                 | Sequence153Zm5g      |                  |
| 0                 | Sequence154Zm5g      |                  |
| 0                 | Sequence155Zm5g      |                  |
| 0                 | Sequence156Zm5g      |                  |
| 0                 | Sequence157Zm5g      |                  |
| 0                 | Sequence158Zm5g      |                  |
| 0                 | Sequence159Zm5g      |                  |
| 0                 | Sequence160Zm5g      |                  |
| 0                 | Sequence161Zm5g      |                  |
| 0                 | Sequence162Zm5g      |                  |
| 0                 | Sequence163Zm5g      |                  |
| 0                 | Sequence164Zm5g      |                  |
| 0                 | Sequence165Zm5g      |                  |
| 0                 | Sequence166Zm5g      |                  |
| 0                 | Sequence167Zm5g      |                  |

**Figure S25:** Synteny block diagram for *MIR172B* with *Zea mays* as reference. The first column shows duplication depth at each gene locus, second column shows the genes in reference chromosomes and the following is aligned collinear blocks where only match genes are displayed. The alignment among non-anchor genes is discarded in the output and denoted by '||' in the multi-alignment of gene orders. Zm5 - *Zea mays* chr 5.

| Duplication depth | Reference chromosome | Collinear blocks |
|-------------------|----------------------|------------------|
| 0                 | Sequence168At5g      |                  |
| 0                 | Sequence169At5g      |                  |
| 0                 | Sequence170At5g      |                  |
| 0                 | Sequence171At5g      |                  |
| 0                 | Sequence172At5g      |                  |
| 0                 | Sequence173At5g      |                  |
| 0                 | Sequence174At5g      |                  |
| 0                 | Sequence175At5g      |                  |
| 0                 | Sequence176At5g      |                  |
| 0                 | Sequence177At5g      |                  |
| 0                 | Sequence178At5g      |                  |
| 0                 | Sequence179At5g      |                  |
| 0                 | Sequence180At5g      |                  |
| 0                 | Sequence181At5g      |                  |
| 0                 | Sequence182At5g      |                  |
| 0                 | Sequence183At5g      |                  |
| 0                 | Sequence184At5g      |                  |
| 0                 | Sequence185At5g      |                  |
| 0                 | Sequence186At5g      |                  |
| 0                 | Sequence187At5g      |                  |
| 0                 | Sequence188At5g      |                  |
| 0                 | Sequence189At5g      |                  |
| 0                 | Sequence190At5g      |                  |
| 0                 | Sequence191At5g      |                  |
| 0                 | Sequence192At5g      |                  |
| 0                 | Sequence193At5g      |                  |
| 0                 | Sequence194At5g      |                  |
| 0                 | Sequence195At5g      |                  |

**Figure S26:** Synteny block diagram for *MIR172B* with *Arabidopsis thaliana* as reference. The first column shows duplication depth at each gene locus, second column shows the genes in reference chromosomes and the following is aligned collinear blocks where only match genes are displayed. The alignment among non-anchor genes is discarded in the output and denoted by ‘||’ in the multi-alignment of gene orders. At5- *Arabidopsis thaliana* chr 5.

| Duplication depth | Reference chromosome | Collinear blocks |                |                |                |  |
|-------------------|----------------------|------------------|----------------|----------------|----------------|--|
| 0                 | Sequence22Ob7g       |                  |                |                |                |  |
| 0                 | Sequence23Ob7g       |                  |                |                |                |  |
| 0                 | Sequence24Ob7g       |                  |                |                |                |  |
| 0                 | Sequence25Ob7g       |                  |                |                |                |  |
| 1                 | Sequence26Ob7g       | Sequence83Or7g   |                |                |                |  |
| 3                 | Sequence27Ob7g       | Sequence84Or7g   | Sequence69Ou7g | Sequence1Os7g  |                |  |
| 4                 | Sequence28Ob7g       | Sequence86Or7g   | Sequence70Ou7g | Sequence3Os7g  | Sequence52Og7g |  |
| 4                 | Sequence29Ob7g       | Sequence89Or7g   | Sequence72Ou7g | Sequence9Os7g  | Sequence53Og7g |  |
| 4                 | Sequence30Ob7g       | Sequence90Or7g   | Sequence73Ou7g | Sequence10Os7g | Sequence54Og7g |  |
| 4                 | Sequence31Ob7g       | Sequence91Or7g   | Sequence74Ou7g | Sequence11Os7g | Sequence55Og7g |  |
| 4                 | Sequence32Ob7g       | Sequence92Or7g   | Sequence75Ou7g |                | Sequence56Og7g |  |
| 4                 | Sequence33Ob7g       |                  | Sequence76Ou7g |                | Sequence57Og7g |  |
| 4                 | Sequence34Ob7g       | Sequence94Or7g   | Sequence77Ou7g | Sequence13Os7g | Sequence58Og7g |  |
| 4                 | Sequence35Ob7g       | Sequence95Or7g   | Sequence78Ou7g | Sequence14Os7g | Sequence59Og7g |  |
| 4                 | Sequence36Ob7g       | Sequence96Or7g   | Sequence79Ou7g | Sequence16Os7g | Sequence60Og7g |  |
| 4                 | Sequence37Ob7g       | Sequence97Or7g   |                |                |                |  |
| 4                 | Sequence38Ob7g       |                  | Sequence80Ou7g | Sequence17Os7g | Sequence62Og7g |  |
| 4                 | Sequence39Ob7g       |                  | Sequence81Ou7g | Sequence18Os7g | Sequence63Og7g |  |
| 3                 | Sequence40Ob7g       |                  |                |                |                |  |
| 3                 | Sequence41Ob7g       |                  |                |                | Sequence65Og7g |  |
| 3                 | Sequence42Ob7g       |                  |                | Sequence20Os7g | Sequence66Og7g |  |
| 2                 | Sequence43Ob7g       |                  |                |                | Sequence67Og7g |  |
| 2                 | Sequence44Ob7g       | Sequence105Or7g  |                |                | Sequence68Og7g |  |
| 0                 | Sequence45Ob7g       |                  |                |                |                |  |
| 0                 | Sequence46Ob7g       |                  |                |                |                |  |

**Figure S27:** Synteny block diagram for *MIR172C* with *Oryza barthii* as reference. The first column shows duplication depth at each gene locus, second column shows the genes in reference chromosomes and the following is aligned collinear blocks where only match genes are displayed. The alignment among non-anchor genes is discarded in the output and denoted by ‘||’ in the multi-alignment of gene orders. Os7- *Oryza sativa* chr 7, Ob7- *Oryza barthii* chr 7, Og7- *Oryza glaberrima* chr 7, Ou7- *Oryza glumaepatula* chr 7, Or7- *Oryza rufipogon* chr 7, Oa7- *Oryza brachyantha* chr 7, Op2- *Oryza punctata* chr 2, Sb4- *Sorghum bicolor* chr 4, Zm4- *Zea mays* chr 4, At3- *Arabidopsis thaliana* chr 3.

| Duplication depth | Reference chromosome | Collinear blocks |                |                |                 |
|-------------------|----------------------|------------------|----------------|----------------|-----------------|
| 0                 | Sequence47Og7g       |                  |                |                |                 |
| 0                 | Sequence48Og7g       |                  |                |                |                 |
| 0                 | Sequence49Og7g       |                  |                |                |                 |
| 0                 | Sequence50Og7g       |                  |                |                |                 |
| 0                 | Sequence51Og7g       |                  |                |                |                 |
| 4                 | Sequence52Og7g       | Sequence3Os7g    | Sequence70Ou7g | Sequence28Ob7g | Sequence86Or7g  |
| 4                 | Sequence53Og7g       | Sequence9Os7g    | Sequence72Ou7g | Sequence29Ob7g | Sequence89Or7g  |
| 4                 | Sequence54Og7g       | Sequence10Os7g   | Sequence73Ou7g | Sequence30Ob7g | Sequence90Or7g  |
| 4                 | Sequence55Og7g       | Sequence11Os7g   | Sequence74Ou7g | Sequence31Ob7g | Sequence91Or7g  |
| 4                 | Sequence56Og7g       |                  | Sequence75Ou7g | Sequence32Ob7g | Sequence92Or7g  |
| 4                 | Sequence57Og7g       |                  | Sequence76Ou7g | Sequence33Ob7g |                 |
| 4                 | Sequence58Og7g       | Sequence13Os7g   | Sequence77Ou7g | Sequence34Ob7g | Sequence94Or7g  |
| 4                 | Sequence59Og7g       | Sequence14Os7g   | Sequence78Ou7g | Sequence35Ob7g | Sequence95Or7g  |
| 4                 | Sequence60Og7g       | Sequence16Os7g   | Sequence79Ou7g | Sequence36Ob7g | Sequence96Or7g  |
| 4                 | Sequence61Og7g       |                  |                |                |                 |
| 4                 | Sequence62Og7g       | Sequence17Os7g   | Sequence80Ou7g | Sequence38Ob7g |                 |
| 4                 | Sequence63Og7g       | Sequence18Os7g   | Sequence81Ou7g | Sequence39Ob7g |                 |
| 3                 | Sequence64Og7g       |                  |                |                |                 |
| 3                 | Sequence65Og7g       |                  |                | Sequence41Ob7g |                 |
| 3                 | Sequence66Og7g       | Sequence20Os7g   |                | Sequence42Ob7g |                 |
| 2                 | Sequence67Og7g       |                  |                | Sequence43Ob7g |                 |
| 2                 | Sequence68Og7g       |                  |                | Sequence44Ob7g | Sequence105Or7g |

**Figure S28:** Synteny block diagram for *MIR172C* with *Oryza glaberrima* as reference. The first column shows duplication depth at each gene locus, second column shows the genes in reference chromosomes and the following is aligned collinear blocks where only match genes are displayed. The alignment among non-anchor genes is discarded in the output and denoted by '||' in the multi-alignment of gene orders. Os7- *Oryza sativa* chr 7, Ob7- *Oryza barthii* chr 7, Og7- *Oryza glaberrima* chr 7, Ou7- *Oryza glumaepatula* chr 7, Or7- *Oryza rufipogon* chr 7.

| Duplication depth | Reference chromosome | Collinear blocks |                |                |                |  |
|-------------------|----------------------|------------------|----------------|----------------|----------------|--|
| 3                 | Sequence69Ou7g       | Sequence27Ob7g   | Sequence84Or7g | Sequence1Os7g  |                |  |
| 4                 | Sequence70Ou7g       | Sequence28Ob7g   | Sequence86Or7g | Sequence3Os7g  | Sequence52Og7g |  |
| 4                 | Sequence71Ou7g       |                  |                |                |                |  |
| 4                 | Sequence72Ou7g       | Sequence29Ob7g   | Sequence89Or7g | Sequence9Os7g  | Sequence53Og7g |  |
| 4                 | Sequence73Ou7g       | Sequence30Ob7g   | Sequence90Or7g | Sequence10Os7g | Sequence54Og7g |  |
| 4                 | Sequence74Ou7g       | Sequence31Ob7g   | Sequence91Or7g | Sequence11Os7g | Sequence55Og7g |  |
| 4                 | Sequence75Ou7g       | Sequence32Ob7g   | Sequence92Or7g |                | Sequence56Og7g |  |
| 4                 | Sequence76Ou7g       | Sequence33Ob7g   |                |                | Sequence57Og7g |  |
| 4                 | Sequence77Ou7g       | Sequence34Ob7g   | Sequence94Or7g | Sequence13Os7g | Sequence58Og7g |  |
| 4                 | Sequence78Ou7g       | Sequence35Ob7g   | Sequence95Or7g | Sequence14Os7g | Sequence59Og7g |  |
| 4                 | Sequence79Ou7g       | Sequence36Ob7g   | Sequence96Or7g | Sequence16Os7g | Sequence60Og7g |  |
| 3                 | Sequence80Ou7g       | Sequence38Ob7g   |                | Sequence17Os7g | Sequence62Og7g |  |
| 3                 | Sequence81Ou7g       | Sequence39Ob7g   |                | Sequence18Os7g | Sequence63Og7g |  |

**Figure S29:** Synteny block diagram for *MIR172C* with *Oryza glumaepatula* as reference. The first column shows duplication depth at each gene locus, second column shows the genes in reference chromosomes and the following is aligned collinear blocks where only match genes are displayed. The alignment among non-anchor genes is discarded in the output and denoted by '||' in the multi-alignment of gene orders. Os7- *Oryza sativa* chr 7, Ob7- *Oryza barthii* chr 7, Og7- *Oryza glaberrima* chr 7, Ou7- *Oryza glumaepatula* chr 7, Or7- *Oryza rufipogon* chr 7.



| Duplication depth | Reference chromosome | Collinear blocks |                |                |                |
|-------------------|----------------------|------------------|----------------|----------------|----------------|
| 0                 | Sequence82Or7g       |                  |                |                |                |
| 1                 | Sequence83Or7g       | Sequence26Ob7g   |                |                |                |
| 3                 | Sequence84Or7g       | Sequence27Ob7g   | Sequence1Os7g  | Sequence69Ou7g |                |
| 3                 | Sequence85Or7g       |                  | Sequence2Os7g  |                |                |
| 4                 | Sequence86Or7g       | Sequence28Ob7g   | Sequence3Os7g  | Sequence70Ou7g | Sequence52Og7g |
| 4                 | Sequence87Or7g       |                  | Sequence4Os7g  |                |                |
| 4                 | Sequence88Or7g       |                  | Sequence6Os7g  |                |                |
| 4                 | Sequence89Or7g       | Sequence29Ob7g   | Sequence9Os7g  | Sequence72Ou7g | Sequence53Og7g |
| 4                 | Sequence90Or7g       | Sequence30Ob7g   | Sequence10Os7g | Sequence73Ou7g | Sequence54Og7g |
| 4                 | Sequence91Or7g       | Sequence31Ob7g   | Sequence11Os7g | Sequence74Ou7g | Sequence55Og7g |
| 4                 | Sequence92Or7g       | Sequence32Ob7g   |                | Sequence75Ou7g | Sequence56Og7g |
| 4                 | Sequence93Or7g       |                  | Sequence12Os7g |                |                |
| 4                 | Sequence94Or7g       | Sequence34Ob7g   | Sequence13Os7g | Sequence77Ou7g | Sequence58Og7g |
| 4                 | Sequence95Or7g       | Sequence35Ob7g   | Sequence15Os7g | Sequence78Ou7g | Sequence59Og7g |
| 4                 | Sequence96Or7g       | Sequence36Ob7g   | Sequence16Os7g | Sequence79Ou7g | Sequence60Og7g |
| 2                 | Sequence97Or7g       | Sequence37Ob7g   |                |                |                |
| 2                 | Sequence98Or7g       |                  |                |                |                |
| 2                 | Sequence99Or7g       |                  |                |                |                |
| 2                 | Sequence100Or7g      |                  |                |                |                |
| 2                 | Sequence101Or7g      |                  |                |                |                |
| 2                 | Sequence102Or7g      |                  |                |                |                |
| 2                 | Sequence103Or7g      |                  |                |                |                |
| 2                 | Sequence104Or7g      |                  |                |                |                |
| 2                 | Sequence105Or7g      | Sequence44Ob7g   |                |                | Sequence68Og7g |
| 0                 | Sequence106Or7g      |                  |                |                |                |
| 0                 | Sequence107Or7g      |                  |                |                |                |
| 0                 | Sequence108Or7g      |                  |                |                |                |
| 0                 | Sequence109Or7g      |                  |                |                |                |

**Figure S30:** Synteny block diagram for *MIR172C* with *Oryza rufipogon* as reference. The first column shows duplication depth at each gene locus, second column shows the genes in reference chromosomes and the following is aligned collinear blocks where only match genes are displayed. The alignment among non-anchor genes is discarded in the output and denoted by '||' in the multi-alignment of gene orders. Os7- *Oryza sativa* chr 7, Ob7- *Oryza barthii* chr 7, Og7- *Oryza glaberrima* chr 7, Ou7- *Oryza glumaepatula* chr 7, Or7- *Oryza rufipogon* chr 7.

| Duplication depth | Reference chromosome | Collinear blocks |
|-------------------|----------------------|------------------|
| 0                 | Sequence110Oa7g      |                  |
| 0                 | Sequence111Oa7g      |                  |
| 0                 | Sequence112Oa7g      |                  |
| 0                 | Sequence113Oa7g      |                  |
| 0                 | Sequence114Oa7g      |                  |
| 0                 | Sequence115Oa7g      |                  |
| 0                 | Sequence116Oa7g      |                  |
| 0                 | Sequence117Oa7g      |                  |
| 0                 | Sequence118Oa7g      |                  |
| 0                 | Sequence119Oa7g      |                  |
| 0                 | Sequence120Oa7g      |                  |
| 0                 | Sequence121Oa7g      |                  |
| 0                 | Sequence122Oa7g      |                  |
| 0                 | Sequence123Oa7g      |                  |
| 0                 | Sequence124Oa7g      |                  |
| 0                 | Sequence125Oa7g      |                  |
| 0                 | Sequence126Oa7g      |                  |
| 0                 | Sequence127Oa7g      |                  |
| 0                 | Sequence128Oa7g      |                  |
| 0                 | Sequence129Oa7g      |                  |
| 0                 | Sequence130Oa7g      |                  |

**Figure S31:** Synteny block diagram for *MIR172C* with *Oryza brachyantha* as reference. The first column shows duplication depth at each gene locus, second column shows the genes in reference chromosomes and the following is aligned collinear blocks where only match genes are displayed. The alignment among non-anchor genes is discarded in the output and denoted by ‘||’ in the multi-alignment of gene orders. Oa7 - *Oryza brachyantha* chr 7.

| Duplication depth | Reference chromosome | Collinear blocks |
|-------------------|----------------------|------------------|
| 0                 | Sequence131Op2g      |                  |
| 0                 | Sequence132Op2g      |                  |
| 0                 | Sequence133Op2g      |                  |
| 0                 | Sequence134Op2g      |                  |
| 0                 | Sequence135Op2g      |                  |
| 0                 | Sequence136Op2g      |                  |
| 0                 | Sequence137Op2g      |                  |
| 0                 | Sequence138Op2g      |                  |
| 0                 | Sequence139Op2g      |                  |
| 0                 | Sequence140Op2g      |                  |
| 0                 | Sequence141Op2g      |                  |
| 0                 | Sequence142Op2g      |                  |
| 0                 | Sequence143Op2g      |                  |
| 0                 | Sequence144Op2g      |                  |
| 0                 | Sequence145Op2g      |                  |
| 0                 | Sequence146Op2g      |                  |
| 0                 | Sequence147Op2g      |                  |
| 0                 | Sequence148Op2g      |                  |
| 0                 | Sequence149Op2g      |                  |
| 0                 | Sequence150Op2g      |                  |
| 0                 | Sequence151Op2g      |                  |
| 0                 | Sequence152Op2g      |                  |

**Figure S32:** Synteny block diagram for *MIR172C* with *Oryza punctata* as reference. The first column shows duplication depth at each gene locus, second column shows the genes in reference chromosomes and the following is aligned collinear blocks where only match genes are displayed. The alignment among non-anchor genes is discarded in the output and denoted by '||' in the multi-alignment of gene orders. Oa7 - *Oryza punctata* chr 2.

| Duplication depth | Reference chromosome | Collinear blocks |
|-------------------|----------------------|------------------|
| 0                 | Sequence153Sb4g      |                  |
| 0                 | Sequence154Sb4g      |                  |
| 0                 | Sequence155Sb4g      |                  |
| 0                 | Sequence156Sb4g      |                  |
| 0                 | Sequence157Sb4g      |                  |
| 0                 | Sequence158Sb4g      |                  |
| 0                 | Sequence159Sb4g      |                  |
| 0                 | Sequence160Sb4g      |                  |
| 0                 | Sequence161Sb4g      |                  |
| 0                 | Sequence162Sb4g      |                  |
| 0                 | Sequence163Sb4g      |                  |
| 0                 | Sequence164Sb4g      |                  |
| 0                 | Sequence165Sb4g      |                  |
| 0                 | Sequence166Sb4g      |                  |
| 0                 | Sequence167Sb4g      |                  |
| 0                 | Sequence168Sb4g      |                  |
| 0                 | Sequence169Sb4g      |                  |
| 0                 | Sequence170Sb4g      |                  |

**Figure S33:** Synteny block diagram for *MIR172C* with *Sorghum bicolor* as reference. The first column shows duplication depth at each gene locus, second column shows the genes in reference chromosomes and the following is aligned collinear blocks where only match genes are displayed. The alignment among non-anchor genes is discarded in the output and denoted by '||' in the multi-alignment of gene orders. Sb4 - *Sorghum bicolor* chr 4.

| Duplication depth | Reference chromosome | Collinear blocks |
|-------------------|----------------------|------------------|
| 0                 | Sequence171Zm4g      |                  |
| 0                 | Sequence172Zm4g      |                  |
| 0                 | Sequence173Zm4g      |                  |
| 0                 | Sequence174Zm4g      |                  |
| 0                 | Sequence175Zm4g      |                  |
| 0                 | Sequence176Zm4g      |                  |
| 0                 | Sequence177Zm4g      |                  |
| 0                 | Sequence178Zm4g      |                  |
| 0                 | Sequence179Zm4g      |                  |
| 0                 | Sequence180Zm4g      |                  |
| 0                 | Sequence181Zm4g      |                  |
| 0                 | Sequence182Zm4g      |                  |

**Figure S34:** Synteny block diagram for *MIR172C* with *Zea mays* as reference. The first column shows duplication depth at each gene locus, second column shows the genes in reference chromosomes and the following is aligned collinear blocks where only match genes are displayed. The alignment among non-anchor genes is discarded in the output and denoted by '||' in the multi-alignment of gene orders. Zm4-*Zea mays* chr 4.

| Duplication depth | Reference chromosome | Collinear blocks |
|-------------------|----------------------|------------------|
| 0                 | Sequence183At3g      |                  |
| 0                 | Sequence184At3g      |                  |
| 0                 | Sequence185At3g      |                  |
| 0                 | Sequence186At3g      |                  |
| 0                 | Sequence187At3g      |                  |
| 0                 | Sequence188At3g      |                  |
| 0                 | Sequence189At3g      |                  |
| 0                 | Sequence190At3g      |                  |
| 0                 | Sequence191At3g      |                  |
| 0                 | Sequence192At3g      |                  |
| 0                 | Sequence193At3g      |                  |
| 0                 | Sequence194At3g      |                  |
| 0                 | Sequence195At3g      |                  |
| 0                 | Sequence196At3g      |                  |
| 0                 | Sequence197At3g      |                  |
| 0                 | Sequence198At3g      |                  |
| 0                 | Sequence199At3g      |                  |
| 0                 | Sequence200At3g      |                  |
| 0                 | Sequence201At3g      |                  |
| 0                 | Sequence202At3g      |                  |
| 0                 | Sequence203At3g      |                  |
| 0                 | Sequence204At3g      |                  |
| 0                 | Sequence205At3g      |                  |
| 0                 | Sequence206At3g      |                  |
| 0                 | Sequence207At3g      |                  |
| 0                 | Sequence208At3g      |                  |
| 0                 | Sequence209At3g      |                  |
| 0                 | Sequence210At3g      |                  |
| 0                 | Sequence211At3g      |                  |

**Figure S35:** Synteny block diagram for *MIR172C* with *Arabidopsis thaliana* as reference. The first column shows duplication depth at each gene locus, second column shows the genes in reference chromosomes and the following is aligned collinear blocks where only match genes are displayed. The alignment among non-anchor genes is discarded in the output and denoted by '||' in the multi-alignment of gene orders. At3 - *Arabidopsis thaliana* chr 3.

| Duplication depth | Reference chromosome | Collinear blocks |                |                 |                 |                 |                 |  |
|-------------------|----------------------|------------------|----------------|-----------------|-----------------|-----------------|-----------------|--|
| 1                 | Sequence43Ob2g       | Sequence2Osi2g   |                |                 |                 |                 |                 |  |
| 4                 | Sequence44Ob2g       | Sequence3Osi2g   | Sequence65Og2g | Sequence143Op2g | Sequence107Or2g |                 |                 |  |
| 5                 | Sequence45Ob2g       | Sequence4Osi2g   | Sequence66Og2g | Sequence144Op2g | Sequence108Or2g | Sequence88Ou2g  |                 |  |
| 5                 | Sequence46Ob2g       |                  | Sequence67Og2g |                 |                 |                 |                 |  |
| 6                 | Sequence47Ob2g       | Sequence7Osi2g   |                | Sequence146Op2g | Sequence110Or2g | Sequence90Ou2g  | Sequence24Osi2g |  |
| 6                 | Sequence48Ob2g       | Sequence8Osi2g   | Sequence68Og2g | Sequence149Op2g |                 | Sequence94Ou2g  | Sequence25Osi2g |  |
| 6                 | Sequence49Ob2g       | Sequence13Osi2g  | Sequence69Og2g | Sequence150Op2g | Sequence111Or2g | Sequence95Ou2g  | Sequence30Osi2g |  |
| 6                 | Sequence50Ob2g       |                  | Sequence70Og2g |                 |                 |                 |                 |  |
| 6                 | Sequence51Ob2g       |                  | Sequence73Og2g |                 |                 |                 |                 |  |
| 6                 | Sequence52Ob2g       |                  | Sequence74Og2g | Sequence151Op2g | Sequence113Or2g | Sequence96Ou2g  | Sequence32Osi2g |  |
| 6                 | Sequence53Ob2g       | Sequence15Osi2g  |                | Sequence152Op2g | Sequence114Or2g |                 |                 |  |
| 6                 | Sequence54Ob2g       | Sequence16Osi2g  | Sequence76Og2g |                 | Sequence115Or2g |                 | Sequence33Osi2g |  |
| 6                 | Sequence55Ob2g       |                  | Sequence77Og2g |                 |                 | Sequence98Ou2g  |                 |  |
| 6                 | Sequence56Ob2g       | Sequence18Osi2g  | Sequence78Og2g |                 | Sequence117Or2g | Sequence99Ou2g  | Sequence35Osi2g |  |
| 6                 | Sequence57Ob2g       | Sequence19Osi2g  | Sequence79Og2g | Sequence154Op2g | Sequence118Or2g | Sequence100Ou2g | Sequence36Osi2g |  |
| 6                 | Sequence58Ob2g       | Sequence20Osi2g  | Sequence80Og2g |                 | Sequence119Or2g | Sequence101Ou2g | Sequence37Osi2g |  |
| 6                 | Sequence59Ob2g       | Sequence21Osi2g  | Sequence81Og2g | Sequence155Op2g | Sequence120Or2g | Sequence102Ou2g | Sequence38Osi2g |  |
| 5                 | Sequence60Ob2g       |                  | Sequence82Og2g | Sequence157Op2g | Sequence121Or2g | Sequence103Ou2g | Sequence39Osi2g |  |
| 5                 | Sequence61Ob2g       |                  | Sequence83Og2g |                 |                 |                 |                 |  |
| 5                 | Sequence62Ob2g       |                  | Sequence84Og2g | Sequence158Op2g | Sequence122Or2g | Sequence104Ou2g | Sequence40Osi2g |  |
| 5                 | Sequence63Ob2g       |                  | Sequence85Og2g | Sequence159Op2g | Sequence123Or2g | Sequence105Ou2g | Sequence41Osi2g |  |
| 5                 | Sequence64Ob2g       |                  | Sequence86Og2g | Sequence160Op2g | Sequence124Or2g | Sequence106Ou2g | Sequence42Osi2g |  |
| 2                 | Sequence65Ob2g       |                  | Sequence87Og2g | Sequence163Op2g |                 |                 |                 |  |

**Figure S36:** Synteny block diagram for *MIR172D* with *Oryza barthii* as reference. The first column shows duplication depth at each gene locus, second column shows the genes in reference chromosomes and the following is aligned collinear blocks where only match genes are displayed. The alignment among non-anchor genes is discarded in the output and denoted by ‘||’ in the multi-alignment of gene orders. Osi2- *Oryza sativa* homeolog i chr 2, Osi2- *Oryza sativa* homeolog ii chr 2, Ob2- *Oryza barthii* chr 2, Og2- *Oryza glaberrima* chr 2, Ou2- *Oryza glumaepatula* chr 2, Or2- *Oryza rufipogon* chr 2, Op2- *Oryza punctata* chr 2.

| Duplication depth | Reference chromosome | Collinear blocks |
|-------------------|----------------------|------------------|
| 4                 | Sequence65Og2g       | Sequence44Ob2g   |
| 5                 | Sequence66Og2g       | Sequence45Ob2g   |
| 5                 | Sequence67Og2g       | Sequence46Ob2g   |
| 6                 | Sequence68Og2g       | Sequence47Ob2g   |
| 6                 | Sequence69Og2g       | Sequence48Ob2g   |
| 6                 | Sequence70Og2g       | Sequence49Ob2g   |
| 6                 | Sequence71Og2g       | Sequence50Ob2g   |
| 6                 | Sequence72Og2g       | Sequence51Ob2g   |
| 6                 | Sequence73Og2g       | Sequence52Ob2g   |
| 6                 | Sequence74Og2g       | Sequence53Ob2g   |
| 6                 | Sequence75Og2g       | Sequence54Ob2g   |
| 6                 | Sequence76Og2g       | Sequence55Ob2g   |
| 6                 | Sequence77Og2g       | Sequence56Ob2g   |
| 6                 | Sequence78Og2g       | Sequence57Ob2g   |
| 6                 | Sequence79Og2g       | Sequence58Ob2g   |
| 6                 | Sequence80Og2g       | Sequence59Ob2g   |
| 6                 | Sequence81Og2g       | Sequence60Ob2g   |
| 6                 | Sequence82Og2g       | Sequence61Ob2g   |
| 5                 | Sequence83Og2g       | Sequence62Ob2g   |
| 5                 | Sequence84Og2g       | Sequence63Ob2g   |
| 5                 | Sequence85Og2g       | Sequence64Ob2g   |
| 5                 | Sequence86Og2g       | Sequence65Ob2g   |
| 3                 | Sequence87Og2g       | Sequence66Ob2g   |
|                   |                      | Sequence3Osi2g   |
|                   |                      | Sequence4Osi2g   |
|                   |                      | Sequence107Or2g  |
|                   |                      | Sequence108Or2g  |
|                   |                      | Sequence143Op2g  |
|                   |                      | Sequence144Op2g  |
|                   |                      | Sequence88Ou2g   |
|                   |                      | Sequence70Si2g   |
|                   |                      | Sequence80Si2g   |
|                   |                      | Sequence109Or2g  |
|                   |                      | Sequence146Op2g  |
|                   |                      | Sequence149Op2g  |
|                   |                      | Sequence90Ou2g   |
|                   |                      | Sequence94Ou2g   |
|                   |                      | Sequence95Ou2g   |
|                   |                      | Sequence24Osi2g  |
|                   |                      | Sequence25Osi2g  |
|                   |                      | Sequence30Osi2g  |
|                   |                      | Sequence150Op2g  |
|                   |                      | Sequence151Op2g  |
|                   |                      | Sequence96Ou2g   |
|                   |                      | Sequence32Osi2g  |
|                   |                      | Sequence160Si2g  |
|                   |                      | Sequence115Or2g  |
|                   |                      | Sequence116Or2g  |
|                   |                      | Sequence117Or2g  |
|                   |                      | Sequence153Op2g  |
|                   |                      | Sequence98Ou2g   |
|                   |                      | Sequence99Ou2g   |
|                   |                      | Sequence33Osi2g  |
|                   |                      | Sequence34Osi2g  |
|                   |                      | Sequence35Osi2g  |
|                   |                      | Sequence190Si2g  |
|                   |                      | Sequence118Or2g  |
|                   |                      | Sequence154Op2g  |
|                   |                      | Sequence100Ou2g  |
|                   |                      | Sequence101Ou2g  |
|                   |                      | Sequence36Osi2g  |
|                   |                      | Sequence200Si2g  |
|                   |                      | Sequence119Or2g  |
|                   |                      | Sequence155Op2g  |
|                   |                      | Sequence102Ou2g  |
|                   |                      | Sequence37Osi2g  |
|                   |                      | Sequence220Si2g  |
|                   |                      | Sequence121Or2g  |
|                   |                      | Sequence156Op2g  |
|                   |                      | Sequence103Ou2g  |
|                   |                      | Sequence38Osi2g  |
|                   |                      | Sequence39Osi2g  |
|                   |                      | Sequence122Or2g  |
|                   |                      | Sequence158Op2g  |
|                   |                      | Sequence104Ou2g  |
|                   |                      | Sequence123Or2g  |
|                   |                      | Sequence159Op2g  |
|                   |                      | Sequence105Ou2g  |
|                   |                      | Sequence41Osi2g  |
|                   |                      | Sequence160Op2g  |
|                   |                      | Sequence106Ou2g  |
|                   |                      | Sequence42Osi2g  |
|                   |                      | Sequence124Or2g  |
|                   |                      | Sequence163Op2g  |

**Figure S37:** Synteny block diagram for *MIR172D* with *Oryza glaberrima* as reference. The first column shows duplication depth at each gene locus, second column shows the genes in reference chromosomes and the following is aligned collinear blocks where only match genes are displayed. The alignment among non-anchor genes is discarded in the output and denoted by '||' in the multi-alignment of gene orders. Osi2- *Oryza sativa* homeolog i chr 2, Osi2- *Oryza sativa* homeolog ii chr 2, Ob2- *Oryza barthii* chr 2, Og2- *Oryza glaberrima* chr 2, Ou2- *Oryza glumaepatula* chr 2, Or2- *Oryza rufipogon* chr 2, Op2- *Oryza punctata* chr 2.



| Duplication depth | Reference chromosome | Collinear blocks |                 |                 |                |                 |                 |
|-------------------|----------------------|------------------|-----------------|-----------------|----------------|-----------------|-----------------|
| 4                 | Sequence88Ou2g       | Sequence66Og2g   | Sequence108Or2g | Sequence4Osi2g  | Sequence45Ob2g |                 |                 |
| 4                 | Sequence89Ou2g       |                  | Sequence109Or2g |                 |                |                 |                 |
| 6                 | Sequence90Ou2g       | Sequence68Og2g   |                 |                 | Sequence47Ob2g | Sequence146Op2g | Sequence27Osi2g |
| 6                 | Sequence91Ou2g       |                  |                 |                 |                |                 |                 |
| 6                 | Sequence92Ou2g       |                  | Sequence110Or2g | Sequence7Osi2g  |                |                 |                 |
| 6                 | Sequence93Ou2g       |                  |                 |                 |                |                 |                 |
| 6                 | Sequence94Ou2g       | Sequence69Og2g   |                 | Sequence11Osi2g | Sequence48Ob2g | Sequence149Op2g | Sequence28Osi2g |
| 6                 | Sequence95Ou2g       | Sequence70Og2g   | Sequence111Or2g | Sequence13Osi2g | Sequence49Ob2g | Sequence150Op2g | Sequence30Osi2g |
| 6                 | Sequence96Ou2g       | Sequence74Og2g   | Sequence113Or2g | Sequence15Osi2g | Sequence51Ob2g | Sequence151Op2g | Sequence32Osi2g |
| 6                 | Sequence97Ou2g       |                  |                 |                 |                |                 |                 |
| 6                 | Sequence98Ou2g       | Sequence77Og2g   | Sequence116Or2g | Sequence17Osi2g | Sequence54Ob2g |                 | Sequence34Osi2g |
| 6                 | Sequence99Ou2g       | Sequence78Og2g   | Sequence117Or2g | Sequence18Osi2g | Sequence55Ob2g |                 | Sequence35Osi2g |
| 6                 | Sequence100Ou2g      | Sequence79Og2g   | Sequence118Or2g | Sequence19Osi2g | Sequence56Ob2g | Sequence154Op2g | Sequence36Osi2g |
| 6                 | Sequence101Ou2g      | Sequence80Og2g   | Sequence119Or2g | Sequence20Osi2g | Sequence57Ob2g |                 | Sequence37Osi2g |
| 6                 | Sequence102Ou2g      | Sequence81Og2g   | Sequence120Or2g |                 | Sequence58Ob2g | Sequence155Op2g |                 |
| 6                 | Sequence103Ou2g      | Sequence82Og2g   | Sequence121Or2g | Sequence22Osi2g | Sequence59Ob2g | Sequence156Op2g | Sequence39Osi2g |
| 5                 | Sequence104Ou2g      | Sequence84Og2g   | Sequence122Or2g |                 | Sequence61Ob2g | Sequence158Op2g | Sequence40Osi2g |
| 5                 | Sequence105Ou2g      | Sequence85Og2g   | Sequence123Or2g |                 | Sequence62Ob2g | Sequence159Op2g | Sequence41Osi2g |
| 4                 | Sequence106Ou2g      | Sequence86Og2g   | Sequence124Or2g |                 | Sequence63Ob2g |                 | Sequence42Osi2g |

**Figure S38:** Synteny block diagram for *MIR172D* with *Oryza glumaepatula* as reference. The first column shows duplication depth at each gene locus, second column shows the genes in reference chromosomes and the following is aligned collinear blocks where only match genes are displayed. The alignment among non-anchor genes is discarded in the output and denoted by '||' in the multi-alignment of gene orders. Osi2- *Oryza sativa* homeolog i chr 2, Osi2- *Oryza sativa* homeolog ii chr 2, Ob2- *Oryza barthii* chr 2, Og2- *Oryza glaberrima* chr 2, Ou2- *Oryza glumaepatula* chr 2, Or2- *Oryza rufipogon* chr 2, Op2- *Oryza punctata* chr 2.

| Duplication depth | Reference chromosome | Collinear blocks |                 |                |                 |                 |                 |  |
|-------------------|----------------------|------------------|-----------------|----------------|-----------------|-----------------|-----------------|--|
| 4                 | Sequence107Or2g      | Sequence65Og2g   | Sequence3Osi2g  | Sequence44Ob2g | Sequence143Op2g |                 |                 |  |
| 5                 | Sequence108Or2g      | Sequence66Og2g   | Sequence4Osi2g  | Sequence45Ob2g | Sequence144Op2g | Sequence88Ou2g  |                 |  |
| 5                 | Sequence109Or2g      | Sequence69Og2g   |                 |                |                 | Sequence89Ou2g  |                 |  |
| 6                 | Sequence110Or2g      |                  | Sequence8Osi2g  | Sequence47Ob2g | Sequence146Op2g | Sequence92Ou2g  | Sequence25Osi2g |  |
| 6                 | Sequence111Or2g      |                  | Sequence13Osi2g | Sequence49Ob2g |                 | Sequence95Ou2g  | Sequence30Osi2g |  |
| 6                 | Sequence112Or2g      |                  |                 |                |                 |                 |                 |  |
| 6                 | Sequence113Or2g      | Sequence74Og2g   |                 | Sequence51Ob2g | Sequence151Op2g | Sequence96Ou2g  | Sequence32Osi2g |  |
| 6                 | Sequence114Or2g      |                  |                 | Sequence52Ob2g |                 |                 |                 |  |
| 6                 | Sequence115Or2g      | Sequence76Og2g   | Sequence16Osi2g | Sequence53Ob2g |                 |                 | Sequence33Osi2g |  |
| 6                 | Sequence116Or2g      | Sequence77Og2g   | Sequence17Osi2g |                | Sequence153Op2g | Sequence98Ou2g  | Sequence34Osi2g |  |
| 6                 | Sequence117Or2g      | Sequence78Og2g   | Sequence18Osi2g | Sequence55Ob2g |                 | Sequence99Ou2g  | Sequence35Osi2g |  |
| 6                 | Sequence118Or2g      | Sequence79Og2g   | Sequence19Osi2g | Sequence56Ob2g | Sequence154Op2g | Sequence100Ou2g | Sequence36Osi2g |  |
| 6                 | Sequence119Or2g      | Sequence80Og2g   | Sequence20Osi2g | Sequence57Ob2g |                 | Sequence101Ou2g | Sequence37Osi2g |  |
| 6                 | Sequence120Or2g      | Sequence81Og2g   | Sequence21Osi2g | Sequence58Ob2g | Sequence155Op2g | Sequence102Ou2g | Sequence38Osi2g |  |
| 6                 | Sequence121Or2g      | Sequence82Og2g   | Sequence22Osi2g | Sequence59Ob2g | Sequence156Op2g | Sequence103Ou2g | Sequence39Osi2g |  |
| 5                 | Sequence122Or2g      | Sequence84Og2g   |                 | Sequence61Ob2g | Sequence158Op2g | Sequence104Ou2g | Sequence40Osi2g |  |
| 5                 | Sequence123Or2g      | Sequence85Og2g   |                 | Sequence62Ob2g |                 | Sequence105Ou2g | Sequence41Osi2g |  |
| 5                 | Sequence124Or2g      | Sequence87Og2g   |                 | Sequence63Ob2g | Sequence163Op2g | Sequence106Ou2g | Sequence42Osi2g |  |

**Figure S39:** Synteny block diagram for *MIR172D* with *Oryza rufipogon* as reference. The first column shows duplication depth at each gene locus, second column shows the genes in reference chromosomes and the following is aligned collinear blocks where only match genes are displayed. The alignment among non-anchor genes is discarded in the output and denoted by '||' in the multi-alignment of gene orders. Osi2- *Oryza sativa* homeolog i chr 2, Osi2- *Oryza sativa* homeolog ii chr 2, Ob2- *Oryza barthii* chr 2, Og2- *Oryza glaberrima* chr 2, Ou2- *Oryza glumaepatula* chr 2, Or2- *Oryza rufipogon* chr 2, Op2- *Oryza punctata* chr 2.

| Duplication depth | Reference chromosome | Collinear blocks |
|-------------------|----------------------|------------------|
| 0                 | Sequence125Oa2g      |                  |
| 0                 | Sequence126Oa2g      |                  |
| 0                 | Sequence127Oa2g      |                  |
| 0                 | Sequence128Oa2g      |                  |
| 0                 | Sequence129Oa2g      |                  |
| 0                 | Sequence130Oa2g      |                  |
| 0                 | Sequence131Oa2g      |                  |
| 0                 | Sequence132Oa2g      |                  |
| 0                 | Sequence133Oa2g      |                  |
| 0                 | Sequence134Oa2g      |                  |
| 0                 | Sequence135Oa2g      |                  |
| 0                 | Sequence136Oa2g      |                  |
| 0                 | Sequence137Oa2g      |                  |
| 0                 | Sequence138Oa2g      |                  |
| 0                 | Sequence139Oa2g      |                  |
| 0                 | Sequence140Oa2g      |                  |
| 0                 | Sequence141Oa2g      |                  |

**Figure S40:** Synteny block diagram for *MIR172D* with *Oryza brachyantha* as reference. The first column shows duplication depth at each gene locus, second column shows the genes in reference chromosomes and the following is aligned collinear blocks where only match genes are displayed. The alignment among non-anchor genes is discarded in the output and denoted by '||' in the multi-alignment of gene orders. Oa2- *Oryza brachyantha* chr 2.

| Duplication depth | Reference chromosome | Collinear blocks |                 |                |                |                 |                 |  |
|-------------------|----------------------|------------------|-----------------|----------------|----------------|-----------------|-----------------|--|
| 0                 | Sequence142Op2g      |                  |                 |                |                |                 |                 |  |
| 4                 | Sequence143Op2g      | Sequence3Osi2g   | Sequence107Or2g | Sequence65Og2g | Sequence44Ob2g |                 |                 |  |
| 4                 | Sequence144Op2g      | Sequence4Osi2g   | Sequence108Or2g | Sequence66Og2g | Sequence45Ob2g |                 |                 |  |
| 4                 | Sequence145Op2g      | Sequence5Osi2g   |                 |                |                |                 |                 |  |
| 6                 | Sequence146Op2g      | Sequence7Osi2g   | Sequence110Or2g | Sequence68Og2g | Sequence47Ob2g | Sequence24Osi2g | Sequence90Ou2g  |  |
| 6                 | Sequence147Op2g      |                  |                 |                |                |                 |                 |  |
| 6                 | Sequence148Op2g      |                  |                 |                |                |                 |                 |  |
| 6                 | Sequence149Op2g      |                  |                 | Sequence69Og2g | Sequence48Ob2g |                 | Sequence94Ou2g  |  |
| 6                 | Sequence150Op2g      | Sequence13Osi2g  |                 | Sequence72Og2g | Sequence49Ob2g | Sequence30Osi2g | Sequence95Ou2g  |  |
| 6                 | Sequence151Op2g      |                  | Sequence113Or2g | Sequence74Og2g | Sequence51Ob2g |                 | Sequence96Ou2g  |  |
| 6                 | Sequence152Op2g      | Sequence15Osi2g  |                 |                | Sequence52Ob2g | Sequence32Osi2g |                 |  |
| 6                 | Sequence153Op2g      | Sequence17Osi2g  | Sequence116Or2g | Sequence77Og2g |                | Sequence34Osi2g |                 |  |
| 5                 | Sequence154Op2g      |                  | Sequence118Or2g | Sequence79Og2g | Sequence56Ob2g |                 | Sequence100Ou2g |  |
| 5                 | Sequence155Op2g      |                  | Sequence120Or2g | Sequence81Og2g | Sequence58Ob2g |                 | Sequence102Ou2g |  |
| 5                 | Sequence156Op2g      |                  | Sequence121Or2g | Sequence82Og2g |                | Sequence39Osi2g | Sequence103Ou2g |  |
| 5                 | Sequence157Op2g      |                  |                 |                | Sequence59Ob2g |                 |                 |  |
| 5                 | Sequence158Op2g      |                  | Sequence122Or2g | Sequence84Og2g | Sequence61Ob2g | Sequence40Osi2g | Sequence104Ou2g |  |
| 5                 | Sequence159Op2g      |                  |                 | Sequence85Og2g | Sequence62Ob2g | Sequence41Osi2g | Sequence105Ou2g |  |
| 4                 | Sequence160Op2g      |                  |                 | Sequence86Og2g | Sequence63Ob2g | Sequence42Osi2g |                 |  |
| 3                 | Sequence161Op2g      |                  |                 |                |                |                 |                 |  |
| 3                 | Sequence162Op2g      |                  |                 |                |                |                 |                 |  |
| 3                 | Sequence163Op2g      |                  | Sequence124Or2g | Sequence87Og2g | Sequence64Ob2g |                 |                 |  |

**Figure S41:** Synteny block diagram for *MIR172D* with *Oryza punctata* as reference. The first column shows duplication depth at each gene locus, second column shows the genes in reference chromosomes and the following is aligned collinear blocks where only match genes are displayed. The alignment among non-anchor genes is discarded in the output and denoted by '||' in the multi-alignment of gene orders. Osi2- *Oryza sativa* homeolog i chr 2, Osi2- *Oryza sativa* homeolog ii chr 2, Ob2- *Oryza barthii* chr 2, Og2- *Oryza glaberrima* chr 2, Ou2- *Oryza glumaepatula* chr 2, Or2- *Oryza rufipogon* chr 2, Op2- *Oryza punctata* chr 2.

| Duplication depth | Reference chromosome | Collinear blocks |                 |                |                |                 |                 |
|-------------------|----------------------|------------------|-----------------|----------------|----------------|-----------------|-----------------|
| 4                 | Sequence24Osi2g      | Sequence146Op2g  | Sequence7Osi2g  | Sequence68Og2g | Sequence47Ob2g |                 |                 |
| 5                 | Sequence25Osi2g      |                  | Sequence8Osi2g  | Sequence69Og2g | Sequence48Ob2g | Sequence110Or2g |                 |
| 5                 | Sequence26Osi2g      |                  | Sequence9Osi2g  |                |                |                 |                 |
| 6                 | Sequence27Osi2g      |                  | Sequence10Osi2g |                |                |                 | Sequence90Ou2g  |
| 6                 | Sequence28Osi2g      |                  | Sequence11Osi2g |                |                |                 | Sequence94Ou2g  |
| 6                 | Sequence29Osi2g      |                  | Sequence12Osi2g |                |                |                 |                 |
| 6                 | Sequence30Osi2g      | Sequence150Op2g  | Sequence13Osi2g | Sequence70Og2g | Sequence49Ob2g | Sequence111Or2g | Sequence95Ou2g  |
| 6                 | Sequence31Osi2g      |                  | Sequence14Osi2g |                |                |                 |                 |
| 6                 | Sequence32Osi2g      | Sequence152Op2g  | Sequence15Osi2g | Sequence74Og2g | Sequence51Ob2g | Sequence113Or2g | Sequence96Ou2g  |
| 6                 | Sequence33Osi2g      |                  | Sequence16Osi2g | Sequence76Og2g | Sequence53Ob2g | Sequence115Or2g |                 |
| 6                 | Sequence34Osi2g      | Sequence153Op2g  | Sequence17Osi2g | Sequence77Og2g |                | Sequence116Or2g | Sequence98Ou2g  |
| 6                 | Sequence35Osi2g      |                  | Sequence18Osi2g | Sequence78Og2g | Sequence55Ob2g | Sequence117Or2g | Sequence99Ou2g  |
| 6                 | Sequence36Osi2g      |                  | Sequence19Osi2g | Sequence79Og2g | Sequence56Ob2g | Sequence118Or2g | Sequence100Ou2g |
| 6                 | Sequence37Osi2g      |                  | Sequence20Osi2g | Sequence80Og2g | Sequence57Ob2g | Sequence119Or2g | Sequence101Ou2g |
| 6                 | Sequence38Osi2g      |                  | Sequence21Osi2g | Sequence81Og2g | Sequence58Ob2g | Sequence120Or2g |                 |
| 6                 | Sequence39Osi2g      | Sequence156Op2g  | Sequence22Osi2g | Sequence82Og2g | Sequence59Ob2g | Sequence121Or2g | Sequence103Ou2g |
| 5                 | Sequence40Osi2g      | Sequence158Op2g  |                 |                | Sequence61Ob2g | Sequence122Or2g | Sequence104Ou2g |
| 5                 | Sequence41Osi2g      | Sequence159Op2g  |                 | Sequence85Og2g | Sequence62Ob2g | Sequence123Or2g | Sequence105Ou2g |
| 5                 | Sequence42Osi2g      | Sequence160Op2g  |                 | Sequence86Og2g | Sequence63Ob2g | Sequence124Or2g | Sequence106Ou2g |

**Figure S42:** Synteny block diagram for *MIR172D* with *Oryza sativa* (ii) as reference. The first column shows duplication depth at each gene locus, second column shows the genes in reference chromosomes and the following is aligned collinear blocks where only match genes are displayed. The alignment among non-anchor genes is discarded in the output and denoted by '||' in the multi-alignment of gene orders. Osi2- *Oryza sativa* homeolog i chr 2, Osi2- *Oryza sativa* homeolog ii chr 2, Ob2- *Oryza barthii* chr 2, Og2- *Oryza glaberrima* chr 2, Ou2- *Oryza glumaepatula* chr 2, Or2- *Oryza rufipogon* chr 2, Op2- *Oryza punctata* chr 2.

| Duplication depth | Reference chromosome | Collinear blocks |
|-------------------|----------------------|------------------|
| 0                 | Sequence164Sb2g      |                  |
| 0                 | Sequence165Sb2g      |                  |
| 0                 | Sequence166Sb2g      |                  |
| 0                 | Sequence167Sb2g      |                  |
| 0                 | Sequence168Sb2g      |                  |
| 0                 | Sequence169Sb2g      |                  |
| 0                 | Sequence170Sb2g      |                  |
| 0                 | Sequence171Sb2g      |                  |
| 0                 | Sequence172Sb2g      |                  |
| 0                 | Sequence173Sb2g      |                  |
| 0                 | Sequence174Sb2g      |                  |
| 0                 | Sequence175Sb2g      |                  |
| 0                 | Sequence176Sb2g      |                  |
| 0                 | Sequence177Sb2g      |                  |
| 0                 | Sequence178Sb2g      |                  |
| 0                 | Sequence179Sb2g      |                  |
| 0                 | Sequence180Sb2g      |                  |
| 0                 | Sequence181Sb2g      |                  |
| 0                 | Sequence182Sb2g      |                  |
| 0                 | Sequence183Sb2g      |                  |
| 0                 | Sequence184Sb2g      |                  |
| 0                 | Sequence185Sb2g      |                  |
| 0                 | Sequence186Sb2g      |                  |
| 0                 | Sequence187Sb2g      |                  |
| 0                 | Sequence188Sb2g      |                  |
| 0                 | Sequence189Sb2g      |                  |
| 0                 | Sequence190Sb2g      |                  |

**Figure S43:** Synteny block diagram for *MIR172D* with *Sorghum bicolor* as reference. The first column shows duplication depth at each gene locus, second column shows the genes in reference chromosomes and the following is aligned collinear blocks where only match genes are displayed. The alignment among non-anchor genes is discarded in the output and denoted by ‘||’ in the multi-alignment of gene orders. Sb2 - *Sorghum bicolor* chr 2.

| Duplication depth | Reference chromosome | Collinear blocks |
|-------------------|----------------------|------------------|
| 0                 | Sequence191Zm6g      |                  |
| 0                 | Sequence192Zm6g      |                  |
| 0                 | Sequence193Zm6g      |                  |
| 0                 | Sequence194Zm6g      |                  |
| 0                 | Sequence195Zm6g      |                  |
| 0                 | Sequence196Zm6g      |                  |
| 0                 | Sequence197Zm6g      |                  |
| 0                 | Sequence198Zm6g      |                  |
| 0                 | Sequence199Zm6g      |                  |
| 0                 | Sequence200Zm6g      |                  |
| 0                 | Sequence201Zm6g      |                  |
| 0                 | Sequence202Zm6g      |                  |
| 0                 | Sequence203Zm6g      |                  |
| 0                 | Sequence204Zm6g      |                  |
| 0                 | Sequence205Zm6g      |                  |
| 0                 | Sequence206Zm6g      |                  |
| 0                 | Sequence207Zm6g      |                  |
| 0                 | Sequence208Zm6g      |                  |
| 0                 | Sequence209Zm6g      |                  |

**Figure S44:** Synteny block diagram for *MIR172D* with *Zea mays* as reference. The first column shows duplication depth at each gene locus, second column shows the genes in reference chromosomes and the following is aligned collinear blocks where only match genes are displayed. The alignment among non-anchor genes is discarded in the output and denoted by '||' in the multi-alignment of gene orders. Zm6 - *Zea mays* chr 6.

| Duplication depth | Reference chromosome | Collinear blocks |
|-------------------|----------------------|------------------|
| 0                 | Sequence210At3g      |                  |
| 0                 | Sequence211At3g      |                  |
| 0                 | Sequence212At3g      |                  |
| 0                 | Sequence213At3g      |                  |
| 0                 | Sequence214At3g      |                  |
| 0                 | Sequence215At3g      |                  |
| 0                 | Sequence216At3g      |                  |
| 0                 | Sequence217At3g      |                  |
| 0                 | Sequence218At3g      |                  |
| 0                 | Sequence219At3g      |                  |
| 0                 | Sequence220At3g      |                  |
| 0                 | Sequence221At3g      |                  |
| 0                 | Sequence222At3g      |                  |
| 0                 | Sequence223At3g      |                  |
| 0                 | Sequence224At3g      |                  |
| 0                 | Sequence225At3g      |                  |
| 0                 | Sequence226At3g      |                  |
| 0                 | Sequence227At3g      |                  |
| 0                 | Sequence228At3g      |                  |
| 0                 | Sequence229At3g      |                  |
| 0                 | Sequence230At3g      |                  |
| 0                 | Sequence231At3g      |                  |
| 0                 | Sequence232At3g      |                  |
| 0                 | Sequence233At3g      |                  |
| 0                 | Sequence234At3g      |                  |
| 0                 | Sequence235At3g      |                  |

**Figure S45:** Synteny block diagram for *MIR172D* with *Arabidopsis thaliana* as reference. The first column shows duplication depth at each gene locus, second column shows the genes in reference chromosomes and the following is aligned collinear blocks where only match genes are displayed. The alignment among non-anchor genes is discarded in the output and denoted by '||' in the multi-alignment of gene orders. At3 - *Arabidopsis thaliana* chr 3.
